# Supplementary material
Source: PubMed Central journal article supplement (PMC6948762)

## **Supplement:**

### **Increased lipogenesis and impaired $\beta$ -oxidation predict type 2 diabetic kidney disease progression in American Indians**

#### **Authors:**

Farsad Afshinnia<sup>1</sup>, Viji Nair<sup>1</sup>, Jiahe Lin<sup>2</sup>, Thekkelnaycke M. Rajendiran<sup>3,4</sup>, Tanu Soni<sup>3</sup>, Jaeman Byun<sup>1</sup>, Kumar Sharma<sup>5</sup>, Patrice E. Fort<sup>6</sup>, Thomas W. Gardner<sup>6</sup>, Helen C. Looker<sup>7</sup>, Robert G. Nelson<sup>7</sup>, Frank C. Brosius<sup>8</sup>, Eva L. Feldman<sup>9</sup>, George Michailidis<sup>10</sup>, Matthias Kretzler<sup>1</sup>, Subramaniam Pennathur<sup>1,3,11</sup>

#### **Affiliations:**

<sup>1</sup>University of Michigan, Department of Internal Medicine-Nephrology, Ann Arbor, MI, USA

<sup>2</sup>University of Michigan, Department of Statistics, Ann Arbor, MI, USA

<sup>3</sup>University of Michigan, Michigan Regional Comprehensive Metabolomics Resource Core, Ann Arbor, MI, USA

<sup>4</sup>University of Michigan, Department of Pathology, Ann Arbor, MI, USA

<sup>5</sup>Department of Internal Medicine-Nephrology, University of Texas Health at San Antonio, San Antonio, TX, USA

<sup>6</sup>Department of Ophthalmology and visual sciences, University of Michigan, Ann Arbor, MI, USA

<sup>7</sup>Chronic Kidney Disease Section, National Institute of Diabetes and Digestive and Kidney Diseases, Phoenix, AZ, USA

<sup>8</sup>Department of Medicine, Division of Nephrology, University of Arizona, Tuscan, AZ, USA

<sup>9</sup>Department of Neurology, University of Michigan, Ann Arbor, MI, USA

<sup>10</sup>Department of Statistics and the Informatics Institute, University of Florida, Gainesville, FL, USA

<sup>11</sup>University of Michigan, Department of Molecular and Integrative Physiology, Ann Arbor, MI, USA

**Supplement Table 1:** Identified lipids by adducts, mass, and retention time in positive and negative modes. The mass accuracy was  $\pm 0.001$  Da in positive mode and  $\pm 0.005$  Da in negative mode, with overall mass error of less than 2 parts per million. CE, cholesterol Esters; DAG, diacylglycerol; LPC, lysophosphatidylcholine; LPE, lysophosphatidylethanolamine; MAG, monoacylglycerol; PC, phosphatidylcholine; pPC, plasmeyn-yl-phosphatidylcholine; PE, phosphatidylethanolamine; pPE: plasmeyn-yl-phosphatidylethanolamine; PA, phosphatidic acid; SM, sphingomyelin; TAG, triacylglycerol; FFA, free Fatty Acid; CerP, ceramide-phosphates; PG, phosphatidylglycerol; PI, phosphatidylinositol; x:y, number of carbons:number of double bonds.

| <b>Lipids in Positive Mode</b> |                      |                        |                      |               |
|--------------------------------|----------------------|------------------------|----------------------|---------------|
| <b>Class</b>                   | <b>Compound name</b> | <b>Type of adducts</b> | <b>m/z</b>           | <b>RT/min</b> |
| CE                             | CE 16:0              | [M+NH <sub>4</sub> ]   | 642.6189             | 10.92         |
|                                | CE 16:1              | [M+NH <sub>4</sub> ]   | 640.6032             | 10.65         |
|                                | CE 17:0              | [M+NH <sub>4</sub> ]   | 656.6345             | 11.11         |
|                                | CE 18:0              | [M+NH <sub>4</sub> ]   | 670.6502             | 11.28         |
|                                | CE 18:1              | [M+NH <sub>4</sub> ]   | 668.6345             | 10.89         |
|                                | CE 18:2              | [M+NH <sub>4</sub> ]   | 666.6189             | 10.72         |
|                                | CE 18:3              | [M+NH <sub>4</sub> ]   | 664.6032             | 10.48         |
|                                | CE 20:3              | [M+NH <sub>4</sub> ]   | 692.6345             | 10.74         |
|                                | CE 20:4              | [M+NH <sub>4</sub> ]   | 690.6189             | 10.52         |
|                                | CE 20:5              | [M+NH <sub>4</sub> ]   | 688.6032             | 10.37         |
|                                | CE 22:4              | [M+NH <sub>4</sub> ]   | 718.6502             | 10.82         |
|                                | CE 22:5              | [M+NH <sub>4</sub> ]   | 716.6345             | 10.64         |
|                                | CE 22:6              | [M+NH <sub>4</sub> ]   | 714.6189             | 10.48         |
|                                | DAG                  | DAG 26:0               | [M+NH <sub>4</sub> ] | 502.4469      |
| DAG 30:0                       |                      | [M+NH <sub>4</sub> ]   | 558.5094             | 7.38          |
| DAG 30:1                       |                      | [M+NH <sub>4</sub> ]   | 556.4938             | 6.89          |
| DAG 31:0                       |                      | [M+NH <sub>4</sub> ]   | 572.5251             | 7.69          |
| DAG 32:0                       |                      | [M+NH <sub>4</sub> ]   | 586.5407             | 7.90          |
| DAG 32:1                       |                      | [M+NH <sub>4</sub> ]   | 584.5251             | 7.48          |
| DAG 32:2                       |                      | [M+NH <sub>4</sub> ]   | 582.5094             | 7.03          |
| DAG 33:0                       |                      | [M+NH <sub>4</sub> ]   | 600.5564             | 8.12          |
| DAG 33:1                       |                      | [M+NH <sub>4</sub> ]   | 598.5407             | 7.76          |
| DAG 34:0                       |                      | [M+NH <sub>4</sub> ]   | 614.5720             | 8.40          |
| DAG 34:1                       |                      | [M+NH <sub>4</sub> ]   | 612.5564             | 7.96          |
| DAG 34:2                       |                      | [M+NH <sub>4</sub> ]   | 610.5407             | 7.58          |
| DAG 34:3                       |                      | [M+NH <sub>4</sub> ]   | 608.5251             | 7.19          |
| DAG 35:1                       |                      | [M+NH <sub>4</sub> ]   | 626.5720             | 8.20          |
| DAG 35:2                       |                      | [M+NH <sub>4</sub> ]   | 624.5564             | 7.83          |
| DAG 36:0                       |                      | [M+NH <sub>4</sub> ]   | 642.6033             | 8.86          |
| DAG 36:1                       |                      | [M+NH <sub>4</sub> ]   | 640.5877             | 8.47          |
| DAG 36:2                       |                      | [M+NH <sub>4</sub> ]   | 638.5720             | 8.07          |
| DAG 36:3                       | [M+NH <sub>4</sub> ] | 636.5564               | 7.68                 |               |

| <b>Lipids in Positive Mode</b> |                      |                        |            |               |
|--------------------------------|----------------------|------------------------|------------|---------------|
| <b>Class</b>                   | <b>Compound name</b> | <b>Type of adducts</b> | <b>m/z</b> | <b>RT/min</b> |
|                                | DAG 36:4             | [M+NH4]                | 634.5407   | 7.33          |
|                                | DAG 36:5             | [M+NH4]                | 632.5251   | 6.94          |
|                                | DAG 38:1             | [M+NH4]                | 668.6189   | 8.93          |
|                                | DAG 38:2             | [M+NH4]                | 666.6033   | 8.52          |
|                                | DAG 38:4             | [M+NH4]                | 662.5720   | 7.90          |
|                                | DAG 38:5             | [M+NH4]                | 660.5564   | 7.61          |
|                                | DAG 38:6             | [M+NH4]                | 658.5407   | 7.25          |
|                                | DAG 38:7             | [M+NH4]                | 656.5251   | 6.89          |
|                                | DAG 40:6             | [M+NH4]                | 686.5720   | 7.68          |
|                                | DAG 40:7             | [M+NH4]                | 684.5564   | 7.52          |
| LPC                            | LPC 14:0             | [M+H]                  | 468.3090   | 1.10          |
|                                | LPC 14:0             | [M+Na]                 | 490.2910   | 1.16          |
|                                | LPC 15:0             | [M+H]                  | 482.3246   | 1.36          |
|                                | LPC 15:0             | [M+Na]                 | 504.3066   | 1.37          |
|                                | LPC 16:0             | [M+H]                  | 496.3403   | 1.62          |
|                                | LPC 16:0             | [M+Na]                 | 504.3430   | 2.11          |
|                                | LPC 16:1             | [M+H]                  | 494.3246   | 1.33          |
|                                | LPC 16:1             | [M+Na]                 | 516.3066   | 1.25          |
|                                | LPC 17:0             | [M+H]                  | 510.3560   | 2.05          |
|                                | LPC 17:0             | [M+Na]                 | 532.3379   | 2.01          |
|                                | LPC 17:1             | [M+H]                  | 508.3403   | 1.49          |
|                                | LPC 18:0             | [M+H]                  | 524.3716   | 2.49          |
|                                | LPC 18:0             | [M+Na]                 | 546.3535   | 2.38          |
|                                | LPC 18:1             | [M+Na]                 | 544.3379   | 1.69          |
|                                | LPC 18:2             | [M+H]                  | 520.3403   | 1.60          |
|                                | LPC 18:2             | [M+Na]                 | 542.3223   | 1.43          |
|                                | LPC 18:3             | [M+H]                  | 518.3246   | 1.12          |
|                                | LPC 18:3             | [M+Na]                 | 540.3066   | 1.15          |
|                                | LPC 19:0             | [M+H]                  | 538.3873   | 2.96          |
|                                | LPC 20:0             | [M+H]                  | 552.4029   | 3.44          |
|                                | LPC 20:1             | [M+H]                  | 550.3873   | 2.64          |
|                                | LPC 20:1             | [M+Na]                 | 572.3692   | 2.62          |
|                                | LPC 20:2             | [M+H]                  | 548.3716   | 20            |
|                                | LPC 20:3             | [M+H]                  | 546.3560   | 1.61          |
|                                | LPC 20:3             | [M+Na]                 | 568.3379   | 1.60          |
|                                | LPC 20:4             | [M+H]                  | 544.3403   | 1.45          |
|                                | LPC 20:4             | [M+Na]                 | 566.3223   | 1.34          |
|                                | LPC 20:5             | [M+H]                  | 542.3246   | 1.08          |
|                                | LPC 22:4             | [M+H]                  | 572.3716   | 1.86          |
|                                | LPC 22:4             | [M+Na]                 | 594.3535   | 1.88          |
|                                | LPC 22:5             | [M+H]                  | 570.3560   | 1.51          |
|                                | LPC 22:6             | [M+H]                  | 568.3403   | 1.30          |
|                                | LPC 24:0             | [M+H]                  | 608.4655   | 5.30          |

| <b>Lipids in Positive Mode</b> |                      |                        |            |               |
|--------------------------------|----------------------|------------------------|------------|---------------|
| <b>Class</b>                   | <b>Compound name</b> | <b>Type of adducts</b> | <b>m/z</b> | <b>RT/min</b> |
| LPE                            | LPE 16:0             | [M+H]                  | 454.2934   | 1.69          |
|                                | LPE 18:0             | [M+H]                  | 482.3246   | 2.48          |
|                                | LPE 18:0             | [M+Na]                 | 504.3066   | 2.62          |
|                                | LPE 18:1             | [M+H]                  | 480.3090   | 1.87          |
|                                | LPE 18:2             | [M+H]                  | 478.2934   | 1.40          |
|                                | LPE 20:4             | [M+H]                  | 502.2934   | 1.34          |
|                                | LPE 22:6             | [M+H]                  | 526.2933   | 1.29          |
| MAG                            | MAG 17:0             | [M+Li]                 | 351.3087   | 3.19          |
|                                | MAG 18:1             | [M+NH <sub>4</sub> ]   | 374.3270   | 2.90          |
| PA                             | PA 34:0              | [M+Na]                 | 699.4941   | 8.37          |
| PC                             | PC 30:0              | [M+Na]                 | 728.5206   | 6.07          |
|                                | PC 30:1              | [M+Na]                 | 726.5050   | 5.54          |
|                                | PC 32:0              | [M+Na]                 | 756.5519   | 6.75          |
|                                | PC 32:1              | [M+Na]                 | 754.5363   | 6.23          |
|                                | PC 32:2              | [M+Na]                 | 752.5206   | 5.75          |
|                                | PC 32:3              | [M+H]                  | 728.5230   | 5.37          |
|                                | PC 33:2              | [M+Na]                 | 766.5363   | 6.09          |
|                                | PC 34:0              | [M+Na]                 | 784.5832   | 7.43          |
|                                | PC 34:2              | [M+Na]                 | 780.5519   | 6.42          |
|                                | PC 34:3              | [M+H]                  | 756.5543   | 6.78          |
|                                | PC 34:3              | [M+Na]                 | 778.5363   | 5.93          |
|                                | PC 34:4              | [M+Na]                 | 776.5206   | 5.68          |
|                                | PC 36:1              | [M+Na]                 | 810.5989   | 7.57          |
|                                | PC 36:2              | [M+Na]                 | 808.5832   | 7.16          |
|                                | PC 36:3              | [M+H]                  | 784.5856   | 7.45          |
|                                | PC 36:4              | [M+H]                  | 782.5700   | 7.86          |
|                                | PC 36:4              | [M+Na]                 | 804.5519   | 6.08          |
|                                | PC 36:5              | [M+H]                  | 780.5543   | 5.60          |
|                                | PC 36:5              | [M+Na]                 | 802.5363   | 5.73          |
|                                | PC 36:6              | [M+H]                  | 778.5387   | 5.89          |
|                                | PC 38:4              | [M+H]                  | 810.6013   | 7.56          |
|                                | PC 38:4              | [M+Na]                 | 832.5832   | 7.02          |
|                                | PC 38:5              | [M+H]                  | 808.5856   | 5.09          |
|                                | PC 38:6              | [M+H]                  | 806.5700   | 6.03          |
|                                | PC 38:6              | [M+Na]                 | 828.5519   | 5.44          |
|                                | PC 38:6              | [M+Na]                 | 828.5519   | 6.14          |
|                                | PC 38:8              | [M+H]                  | 802.5387   | 5.86          |
|                                | PC 40:10             | [M+H]                  | 826.5387   | 5.62          |
|                                | PC 40:4              | [M+Na]                 | 860.6145   | 7.55          |
|                                | PC 40:9              | [M+H]                  | 828.5543   | 6.09          |
| PC 42:10                       | [M+H]                | 854.5700               | 5.83       |               |
| PE                             | PE 32:1              | [M+H]                  | 690.5074   | 6.27          |
|                                | PE 34:0              | [M+H]                  | 720.5543   | 7.38          |

| <b>Lipids in Positive Mode</b> |                      |                        |            |               |
|--------------------------------|----------------------|------------------------|------------|---------------|
| <b>Class</b>                   | <b>Compound name</b> | <b>Type of adducts</b> | <b>m/z</b> | <b>RT/min</b> |
|                                | PE 34:1              | [M+H]                  | 718.5387   | 6.90          |
|                                | PE 34:2              | [M+H]                  | 716.5230   | 6.46          |
|                                | PE 35:2              | [M+H]                  | 730.5387   | 6.79          |
|                                | PE 36:0              | [M+H]                  | 748.5856   | 7.91          |
|                                | PE 36:1              | [M+H]                  | 746.5700   | 7.50          |
|                                | PE 36:2              | [M+H]                  | 744.5543   | 7.01          |
|                                | PE 36:2              | [M+H]                  | 744.5543   | 7.12          |
|                                | PE 36:3              | [M+H]                  | 742.5387   | 6.59          |
|                                | PE 36:4              | [M+H]                  | 740.5230   | 6.40          |
|                                | PE 36:5              | [M+H]                  | 738.5074   | 5.88          |
|                                | PE 38:3              | [M+H]                  | 770.5700   | 7.28          |
|                                | PE 38:4              | [M+H]                  | 768.5543   | 7.04          |
|                                | PE 38:5              | [M+H]                  | 766.5387   | 6.54          |
|                                | PE 40:6              | [M+H]                  | 792.5543   | 6.94          |
| pPC                            | pPC 18:0             | [M+Na]                 | 544.3379   | 1.89          |
| pPE                            | pPE 34:1             | [M+H]                  | 702.5438   | 7.22          |
|                                | pPE 34:2             | [M+H]                  | 700.5281   | 6.75          |
|                                | pPE 34:2             | [M+H]                  | 700.5281   | 6.82          |
|                                | pPE 36:1             | [M+H]                  | 730.5751   | 7.80          |
|                                | pPE 36:2             | [M+H]                  | 728.5594   | 7.37          |
|                                | pPE 36:4             | [M+H]                  | 724.5281   | 6.72          |
|                                | pPE 36:5             | [M+H]                  | 722.5125   | 6.34          |
|                                | pPE 38:1             | [M+H]                  | 758.6063   | 8.27          |
|                                | pPE 38:2             | [M+H]                  | 756.5907   | 7.95          |
|                                | pPE 38:3             | [M+H]                  | 754.5751   | 7.58          |
|                                | pPE 38:4             | [M+H]                  | 752.5594   | 7.33          |
|                                | pPE 38:6             | [M+H]                  | 748.5281   | 6.64          |
|                                | pPE 40:4             | [M+H]                  | 780.5907   | 7.78          |
|                                | pPE 40:5             | [M+H]                  | 778.5751   | 7.46          |
|                                | pPE 40:6             | [M+H]                  | 776.5594   | 7.25          |
| SM                             | SM 21:0              | [M]                    | 523.3876   | 1.87          |
|                                | SM 30:1              | [M]                    | 647.5128   | 4.46          |
|                                | SM 30:1              | [M+Na]                 | 669.4948   | 4.41          |
|                                | SM 31:1              | [M]                    | 661.5284   | 4.84          |
|                                | SM 32:0              | [M]                    | 677.5597   | 5.53          |
|                                | SM 32:0              | [M+Na]                 | 699.5417   | 5.47          |
|                                | SM 32:1              | [M+Na]                 | 697.5261   | 2.13          |
|                                | SM 32:1              | [M+Na]                 | 697.5261   | 5.23          |
|                                | SM 32:2              | [M]                    | 673.5284   | 4.66          |
|                                | SM 33:0              | [M]                    | 691.5754   | 5.86          |
|                                | SM 33:1              | [M]                    | 689.5597   | 4.41          |
|                                | SM 33:1              | [M+Na]                 | 711.5417   | 5.60          |
|                                | SM 33:2              | [M]                    | 687.5441   | 5.05          |

| <b>Lipids in Positive Mode</b> |                      |                        |            |               |
|--------------------------------|----------------------|------------------------|------------|---------------|
| <b>Class</b>                   | <b>Compound name</b> | <b>Type of adducts</b> | <b>m/z</b> | <b>RT/min</b> |
|                                | SM 34:1              | [M]                    | 703.5754   | 5.89          |
|                                | SM 34:1              | [M+Na]                 | 725.5573   | 5.94          |
|                                | SM 34:2              | [M+Na]                 | 723.5417   | 5.37          |
|                                | SM 35:1              | [M]                    | 717.5911   | 5.67          |
|                                | SM 35:1              | [M]                    | 717.5911   | 6.26          |
|                                | SM 35:1              | [M+Na]                 | 739.5730   | 6.27          |
|                                | SM 35:2              | [M]                    | 715.5754   | 5.66          |
|                                | SM 35:2              | [M+Na]                 | 737.5573   | 5.78          |
|                                | SM 36:1              | [M+Na]                 | 753.5886   | 6.67          |
|                                | SM 36:2              | [M+Na]                 | 751.5730   | 6.14          |
|                                | SM 37:1              | [M]                    | 745.6224   | 6.97          |
|                                | SM 37:2              | [M]                    | 743.6067   | 6.56          |
|                                | SM 38:0              | [M]                    | 761.6536   | 7.55          |
|                                | SM 38:1              | [M]                    | 759.6380   | 7.10          |
|                                | SM 38:1              | [M+Na]                 | 781.6199   | 7.32          |
|                                | SM 38:2              | [M]                    | 757.6224   | 6.69          |
|                                | SM 38:4              | [M]                    | 753.5911   | 5.87          |
|                                | SM 39:0              | [M]                    | 775.6693   | 7.85          |
|                                | SM 39:1              | [M+Na]                 | 795.6356   | 7.66          |
|                                | SM 39:2              | [M]                    | 771.6380   | 7.15          |
|                                | SM 40:1              | [M+Na]                 | 809.6513   | 7.92          |
|                                | SM 40:2              | [M]                    | 785.6536   | 7.05          |
|                                | SM 40:2              | [M+Na]                 | 807.6356   | 7.44          |
|                                | SM 41:1              | [M+Na]                 | 823.6669   | 8.21          |
|                                | SM 41:2              | [M+Na]                 | 821.6513   | 7.76          |
|                                | SM 41:4              | [M]                    | 795.6380   | 6.86          |
|                                | SM 41:5              | [M]                    | 793.6224   | 6.32          |
|                                | SM 42:1              | [M+Na]                 | 837.6826   | 8.49          |
|                                | SM 42:2              | [M]                    | 813.6849   | 11.70         |
|                                | SM 42:2              | [M+Na]                 | 835.6669   | 7.93          |
|                                | SM 42:4              | [M]                    | 809.6536   | 7.00          |
|                                | SM 42:5              | [M]                    | 807.6380   | 6.61          |
|                                | SM 43:1              | [M]                    | 829.7163   | 8.77          |
|                                | SM 43:1              | [M+Na]                 | 851.6982   | 8.78          |
|                                | SM 43:2              | [M]                    | 827.7006   | 8.31          |
|                                | SM 43:4              | [M]                    | 823.6693   | 7.34          |
|                                | SM 44:1              | [M]                    | 843.7319   | 9.05          |
|                                | SM 44:2              | [M]                    | 841.7163   | 8.49          |
| TAG                            | TAG 40:0             | [M+NH4]                | 712.6451   | 9.45          |
|                                | TAG 42:0             | [M+NH4]                | 740.6764   | 9.77          |
|                                | TAG 42:1             | [M+NH4]                | 738.6608   | 9.49          |
|                                | TAG 44:1             | [M+NH4]                | 766.6921   | 9.79          |
|                                | TAG 46:0             | [M+NH4]                | 796.7390   | 10.31         |

| <b>Lipids in Positive Mode</b> |                      |                        |            |               |
|--------------------------------|----------------------|------------------------|------------|---------------|
| <b>Class</b>                   | <b>Compound name</b> | <b>Type of adducts</b> | <b>m/z</b> | <b>RT/min</b> |
|                                | TAG 46:1             | [M+Na]                 | 799.6787   | 10.08         |
|                                | TAG 46:1             | [M+NH4]                | 794.7233   | 10.04         |
|                                | TAG 46:2             | [M+NH4]                | 792.7077   | 9.80          |
|                                | TAG 48:0             | [M+NH4]                | 824.7702   | 10.55         |
|                                | TAG 48:1             | [M+NH4]                | 822.7546   | 10.29         |
|                                | TAG 48:2             | [M+NH4]                | 820.7390   | 10.07         |
|                                | TAG 48:3             | [M+NH4]                | 818.7233   | 9.84          |
|                                | TAG 49:0             | [M+NH4]                | 838.7859   | 10.66         |
|                                | TAG 49:1             | [M+NH4]                | 836.7702   | 10.45         |
|                                | TAG 49:2             | [M+NH4]                | 834.7546   | 10.24         |
|                                | TAG 50:0             | [M+NH4]                | 852.8015   | 10.79         |
|                                | TAG 50:1             | [M+NH4]                | 850.7859   | 10.53         |
|                                | TAG 50:2             | [M+NH4]                | 848.7702   | 10.30         |
|                                | TAG 50:3             | [M+NH4]                | 846.7546   | 10.11         |
|                                | TAG 50:3             | [M+NH4]                | 846.7546   | 9.20          |
|                                | TAG 50:4             | [M+NH4]                | 844.7390   | 8.98          |
|                                | TAG 50:4             | [M+NH4]                | 844.7390   | 9.91          |
|                                | TAG 50:5             | [M+NH4]                | 842.7233   | 9.73          |
|                                | TAG 51:1             | [M+NH4]                | 864.8015   | 10.69         |
|                                | TAG 51:2             | [M+NH4]                | 862.7859   | 10.51         |
|                                | TAG 51:3             | [M+NH4]                | 860.7702   | 10.31         |
|                                | TAG 51:4             | [M+NH4]                | 858.7546   | 10.06         |
|                                | TAG 52:0             | [M+Na]                 | 885.7882   | 11.02         |
|                                | TAG 52:0             | [M+NH4]                | 880.8328   | 11.03         |
|                                | TAG 52:1             | [M+Na]                 | 883.7726   | 10.82         |
|                                | TAG 52:1             | [M+NH4]                | 878.8172   | 10.80         |
|                                | TAG 52:2             | [M+NH4]                | 876.8015   | 10.54         |
|                                | TAG 52:3             | [M+Na]                 | 879.7413   | 10.38         |
|                                | TAG 52:3             | [M+NH4]                | 874.7859   | 10.36         |
|                                | TAG 52:4             | [M+NH4]                | 872.7702   | 10.17         |
|                                | TAG 52:4             | [M+NH4]                | 872.7702   | 9.27          |
|                                | TAG 52:5             | [M+NH4]                | 870.7546   | 9.99          |
|                                | TAG 52:6             | [M+Na]                 | 873.6944   | 9.77          |
|                                | TAG 52:6             | [M+NH4]                | 868.7390   | 9.79          |
|                                | TAG 53:0             | [M+NH4]                | 894.8484   | 11.14         |
|                                | TAG 53:1             | [M+NH4]                | 892.8328   | 10.92         |
|                                | TAG 53:2             | [M+NH4]                | 890.8172   | 10.73         |
|                                | TAG 53:3             | [M+NH4]                | 888.8015   | 10.54         |
|                                | TAG 53:4             | [M+NH4]                | 886.7859   | 10.34         |
|                                | TAG 53:5             | [M+NH4]                | 884.7702   | 10.16         |
|                                | TAG 54:1             | [M+Na]                 | 911.8038   | 11.02         |
|                                | TAG 54:1             | [M+NH4]                | 906.8484   | 11.05         |
|                                | TAG 54:2             | [M+NH4]                | 904.8328   | 10.84         |

| <b>Lipids in Positive Mode</b> |                      |                        |            |               |
|--------------------------------|----------------------|------------------------|------------|---------------|
| <b>Class</b>                   | <b>Compound name</b> | <b>Type of adducts</b> | <b>m/z</b> | <b>RT/min</b> |
|                                | TAG 54:3             | [M+NH4]                | 902.8172   | 10.63         |
|                                | TAG 54:4             | [M+NH4]                | 900.8015   | 10.42         |
|                                | TAG 54:5             | [M+NH4]                | 898.7859   | 10.24         |
|                                | TAG 54:6             | [M+Na]                 | 901.7257   | 10.04         |
|                                | TAG 54:6             | [M+NH4]                | 896.7702   | 10.04         |
|                                | TAG 54:7             | [M+Na]                 | 899.7100   | 9.84          |
|                                | TAG 54:7             | [M+NH4]                | 894.7546   | 9.89          |
|                                | TAG 54:8             | [M+NH4]                | 892.7390   | 9.67          |
|                                | TAG 56:0             | [M+NH4]                | 936.8954   | 11.52         |
|                                | TAG 56:1             | [M+NH4]                | 934.8797   | 11.28         |
|                                | TAG 56:2             | [M+NH4]                | 932.8641   | 11.06         |
|                                | TAG 56:3             | [M+NH4]                | 930.8484   | 10.87         |
|                                | TAG 56:4             | [M+NH4]                | 928.8328   | 10.70         |
|                                | TAG 56:5             | [M+NH4]                | 926.8172   | 10.54         |
|                                | TAG 56:6             | [M+NH4]                | 924.8015   | 10.36         |
|                                | TAG 56:7             | [M+NH4]                | 922.7859   | 10.17         |
|                                | TAG 56:8             | [M+NH4]                | 920.7702   | 9.99          |
|                                | TAG 56:9             | [M+NH4]                | 918.7546   | 9.82          |
|                                | TAG 58:1             | [M+NH4]                | 962.9110   | 11.55         |
|                                | TAG 58:10            | [M+NH4]                | 944.7702   | 9.91          |
|                                | TAG 58:3             | [M+NH4]                | 958.8797   | 11.10         |
|                                | TAG 58:5             | [M+NH4]                | 954.8484   | 10.76         |
|                                | TAG 58:6             | [M+NH4]                | 952.8328   | 10.60         |
|                                | TAG 58:7             | [M+NH4]                | 950.8172   | 10.49         |
|                                | TAG 58:8             | [M+NH4]                | 948.8015   | 10.23         |
|                                | TAG 58:9             | [M+NH4]                | 946.7859   | 10.10         |
|                                | TAG 60:12            | [M+NH4]                | 968.7702   | 10.88         |
|                                | TAG 62:1             | [M+NH4]                | 1018.9740  | 12.09         |

| <b>Lipids in Negative Mode</b> |                      |                        |            |               |
|--------------------------------|----------------------|------------------------|------------|---------------|
| <b>Class</b>                   | <b>Compound name</b> | <b>Type of Adducts</b> | <b>m/z</b> | <b>RT/min</b> |
| FFA                            | FFA 16:0             |                        | 255.2329   | 2.30          |
|                                | FFA 18:0             |                        | 283.2642   | 3.27          |
|                                | FFA 18:1             |                        | 281.2486   | 2.50          |
|                                | FFA 18:2             |                        | 279.2329   | 1.92          |
|                                | FFA 20:0             |                        | 311.2955   | 4.30          |
|                                | FFA 20:1             |                        | 309.2799   | 3.45          |
|                                | FFA 20:2             |                        | 307.2642   | 2.82          |
|                                | FFA 22:0             |                        | 339.3268   | 5.29          |
|                                | FFA 22:1             |                        | 337.3112   | 4.43          |
|                                | FFA 22:2             |                        | 335.2955   | 3.76          |
|                                | FFA 22:3             |                        | 333.2799   | 3.18          |



| <b>Lipids in Negative Mode</b> |                                     |                        |            |               |
|--------------------------------|-------------------------------------|------------------------|------------|---------------|
| <b>Class</b>                   | <b>Compound name</b>                | <b>Type of Adducts</b> | <b>m/z</b> | <b>RT/min</b> |
|                                | FFA 24:0                            |                        | 367.3581   | 6.21          |
|                                | FFA 24:1                            |                        | 365.3425   | 5.36          |
|                                | FFA 24:2                            |                        | 363.3268   | 4.70          |
|                                | FFA 24:3                            |                        | 361.3112   | 4.07          |
|                                | FFA 20:4                            |                        | 303.2329   | 1.85          |
| CerP                           | CerP 34:1                           | [M-H]                  | 616.4706   | 5.91          |
| LPE                            | LPE 16:0                            | [M-H]                  | 452.2777   | 1.71          |
|                                | LPE 18:0                            | [M-H]                  | 480.3090   | 2.49          |
|                                | LPE 18:1                            | [M-H]                  | 478.2934   | 1.88          |
|                                | LPE 18:2                            | [M-H]                  | 476.2777   | 1.40          |
|                                | LPE 20:3                            | [M-H]                  | 502.2934   | 1.68          |
|                                | LPE 20:4                            | [M-H]                  | 500.2777   | 1.37          |
|                                | LPE 22:4                            | [M-H]                  | 528.3090   | 1.91          |
|                                | LPE 22:5                            | [M-H]                  | 526.2934   | 1.62          |
|                                | LPE 22:6                            | [M-H]                  | 524.2777   | 1.33          |
| Spinganine                     | N-(hexadecanoyl)-<br>sphing-4-enine | [M-H]                  | 536.5041   | 6.85          |
| PA                             | PA 34:2                             | [M-H]                  | 671.4652   | 6.36          |
| PC                             | PC 30:0                             | [M-Ac-H]               | 764.5442   | 6.12          |
|                                | PC 30:1                             | [M-Ac-H]               | 762.5285   | 5.59          |
|                                | PC 30:2                             | [M-Ac-H]               | 760.5129   | 5.06          |
|                                | PC 32:0                             | [M-Ac-H]               | 792.5754   | 6.81          |
|                                | PC 32:1                             | [M-Ac-H]               | 790.5598   | 6.26          |
|                                | PC 32:2                             | [M-Ac-H]               | 788.5442   | 5.77          |
|                                | PC 32:3                             | [M-Ac-H]               | 786.5285   | 5.32          |
|                                | PC 33:1                             | [M-Ac-H]               | 804.5754   | 6.60          |
|                                | PC 33:2                             | [M-Ac-H]               | 802.5598   | 6.13          |
|                                | PC 34:1                             | [M-Ac-H]               | 818.5911   | 6.85          |
|                                | PC 34:2                             | [M-Ac-H]               | 816.5754   | 4.54          |
|                                | PC 34:3                             | [M-Ac-H]               | 814.5598   | 5.94          |
|                                | PC 34:4                             | [M-Ac-H]               | 812.5442   | 5.71          |
|                                | PC 35:1                             | [M-Ac-H]               | 832.6068   | 7.24          |
|                                | PC 35:2                             | [M-Ac-H]               | 830.5911   | 6.75          |
|                                | PC 35:3                             | [M-Ac-H]               | 828.5754   | 6.26          |
|                                | PC 36:1                             | [M-Ac-H]               | 846.6224   | 7.54          |
|                                | PC 36:2                             | [M-Ac-H]               | 844.6068   | 10.73         |
|                                | PC 36:2                             | [M-Ac-H]               | 844.6068   | 7.04          |
|                                | PC 36:3                             | [M-Ac-H]               | 842.5911   | 6.56          |
|                                | PC 36:4                             | [M-Ac-H]               | 840.5754   | 6.23          |
|                                | PC 36:5                             | [M-Ac-H]               | 838.5598   | 5.81          |
|                                | PC 36:6                             | [M-Ac-H]               | 836.5442   | 5.45          |
|                                | PC 37:2                             | [M-Ac-H]               | 858.6224   | 7.42          |
|                                | PC 37:3                             | [M-Ac-H]               | 856.6068   | 6.91          |

| <b>Lipids in Negative Mode</b> |                      |                        |            |               |
|--------------------------------|----------------------|------------------------|------------|---------------|
| <b>Class</b>                   | <b>Compound name</b> | <b>Type of Adducts</b> | <b>m/z</b> | <b>RT/min</b> |
|                                | PC 37:4              | [M-Ac-H]               | 854.5911   | 6.68          |
|                                | PC 37:6              | [M-Ac-H]               | 850.5598   | 5.91          |
|                                | PC 38:2              | [M-Ac-H]               | 872.6381   | 7.71          |
|                                | PC 38:3              | [M-Ac-H]               | 870.6224   | 7.30          |
|                                | PC 38:4              | [M-Ac-H]               | 868.6068   | 6.92          |
|                                | PC 38:5              | [M-Ac-H]               | 866.5911   | 6.55          |
|                                | PC 38:6              | [M-Ac-H]               | 864.5754   | 6.19          |
|                                | PC 38:7              | [M-Ac-H]               | 862.5598   | 5.65          |
|                                | PC 39:6              | [M-Ac-H]               | 878.5911   | 6.58          |
|                                | PC 40:4              | [M-Ac-H]               | 896.6381   | 7.53          |
|                                | PC 40:5              | [M-Ac-H]               | 894.6224   | 7.21          |
|                                | PC 40:6              | [M-Ac-H]               | 892.6068   | 6.83          |
|                                | PC 40:7              | [M-Ac-H]               | 890.5911   | 6.31          |
|                                | PC 40:8              | [M-Ac-H]               | 888.5754   | 5.90          |
|                                | PC 42:10             | [M-Ac-H]               | 912.5754   | 5.78          |
| PE                             | PE 32:0              | [M-H]                  | 690.5074   | 6.79          |
|                                | PE 32:1              | [M-H]                  | 688.4917   | 6.28          |
|                                | PE 33:0              | [M-H]                  | 704.5231   | 7.08          |
|                                | PE 33:1              | [M-H]                  | 702.5074   | 6.60          |
|                                | PE 34:1              | [M-H]                  | 716.5231   | 6.90          |
|                                | PE 34:2              | [M-H]                  | 714.5074   | 6.43          |
|                                | PE 34:3              | [M-H]                  | 712.4917   | 6.02          |
|                                | PE 35:1              | [M-H]                  | 730.5387   | 7.14          |
|                                | PE 35:2              | [M-H]                  | 728.5231   | 6.77          |
|                                | PE 35:3              | [M-H]                  | 726.5074   | 6.23          |
|                                | PE 35:4              | [M-H]                  | 724.4917   | 6.09          |
|                                | PE 36:0              | [M-H]                  | 746.5700   | 7.92          |
|                                | PE 36:1              | [M-H]                  | 744.5543   | 6.94          |
|                                | PE 36:1              | [M-H]                  | 744.5543   | 7.49          |
|                                | PE 36:2              | [M-H]                  | 742.5387   | 7.06          |
|                                | PE 36:3              | [M-H]                  | 740.5231   | 5.14          |
|                                | PE 36:3              | [M-H]                  | 740.5231   | 6.58          |
|                                | PE 36:4              | [M-H]                  | 738.5074   | 6.26          |
|                                | PE 36:5              | [M-H]                  | 736.4917   | 6.01          |
|                                | PE 37:4              | [M-H]                  | 752.5231   | 6.72          |
|                                | PE 38:2              | [M-H]                  | 770.5700   | 7.51          |
|                                | PE 38:3              | [M-H]                  | 768.5543   | 7.29          |
|                                | PE 38:4              | [M-H]                  | 766.5387   | 6.96          |
|                                | PE 38:5              | [M-H]                  | 764.5231   | 6.56          |
|                                | PE 38:6              | [M-H]                  | 762.5074   | 6.16          |
|                                | PE 40:4              | [M-H]                  | 794.5700   | 7.47          |
|                                | PE 40:5              | [M-H]                  | 792.5543   | 7.20          |
|                                | PE 40:6              | [M-H]                  | 790.5387   | 6.95          |

| <b>Lipids in Negative Mode</b> |                      |                        |            |               |
|--------------------------------|----------------------|------------------------|------------|---------------|
| <b>Class</b>                   | <b>Compound name</b> | <b>Type of Adducts</b> | <b>m/z</b> | <b>RT/min</b> |
| PG                             | PE 40:7              | [M-H]                  | 788.5231   | 6.44          |
|                                | PE 40:8              | [M-H]                  | 786.5074   | 6.02          |
|                                | PG 33:0              | [M-H]                  | 735.5176   | 6.04          |
|                                | PG 36:0              | [M-H]                  | 777.5646   | 6.88          |
|                                | PG 36:2              | [M-H]                  | 773.5333   | 6.04          |
| PI                             | PI 32:1              | [M-H]                  | 807.5024   | 5.05          |
|                                | PI 34:2              | [M-H]                  | 833.5180   | 5.22          |
|                                | PI 36:2              | [M-H]                  | 861.5493   | 5.87          |
|                                | PI 36:3              | [M-H]                  | 859.5337   | 5.36          |
|                                | PI 36:4              | [M-H]                  | 857.5180   | 5.22          |
|                                | PI 38:3              | [M-H]                  | 887.5649   | 6.04          |
|                                | PI 38:4              | [M-H]                  | 885.5493   | 5.85          |
|                                | PI 38:5              | [M-H]                  | 883.5337   | 5.37          |
| pPE                            | pPE 32:1             | [M-H]                  | 672.4968   | 6.65          |
|                                | pPE 34:1             | [M-H]                  | 700.5281   | 7.25          |
|                                | pPE 34:2             | [M-H]                  | 698.5124   | 6.78          |
|                                | pPE 34:3             | [M-H]                  | 696.4968   | 6.40          |
|                                | pPE 36:1             | [M-H]                  | 728.5594   | 7.81          |
|                                | pPE 36:2             | [M-H]                  | 726.5438   | 7.36          |
|                                | pPE 36:3             | [M-H]                  | 724.5281   | 6.96          |
|                                | pPE 36:4             | [M-H]                  | 722.5124   | 6.72          |
|                                | pPE 36:5             | [M-H]                  | 720.4968   | 6.38          |
|                                | pPE 38:1             | [M-H]                  | 756.5907   | 8.30          |
|                                | pPE 38:2             | [M-H]                  | 754.5751   | 7.97          |
|                                | pPE 38:3             | [M-H]                  | 752.5594   | 7.58          |
|                                | pPE 38:4             | [M-H]                  | 750.5438   | 7.29          |
|                                | pPE 38:5             | [M-H]                  | 748.5281   | 6.80          |
|                                | pPE 38:6             | [M-H]                  | 746.5124   | 6.61          |
|                                | pPE 40:4             | [M-H]                  | 778.5751   | 7.82          |
|                                | pPE 40:5             | [M-H]                  | 776.5594   | 7.43          |
|                                | pPE 40:6             | [M-H]                  | 774.5438   | 7.25          |
|                                | pPE 42:5             | [M-H]                  | 804.5907   | 7.91          |
|                                | pPE 42:6             | [M-H]                  | 802.5751   | 7.80          |
| PS                             | PS 36:1              | [M-H]                  | 788.5442   | 6.43          |
|                                | PS 38:4              | [M-H]                  | 810.5285   | 6.01          |

**Supplement Table 2:** Alignment of various lipid species into different principle components using principle component analysis.

| TAG       |          |           | DAG       |          | pPE       |           |          | CE        |          | PE        |             |
|-----------|----------|-----------|-----------|----------|-----------|-----------|----------|-----------|----------|-----------|-------------|
| Short LDB | Int LDB  | Int HDB   | Short LDB | Long HDB | Short LDB | Short HDB | Long HDB | Short LDB | Long HDB | Saturated | Unsaturated |
| TAG 40:0  | TAG 52:2 | TAG 50:4  | DAG 30:0  | DAG 34:2 | pPE 32:1  | pPE 36:4  | pPE 38:1 | CE 16:0   | CE 18:2  | PE 34:0   | PE 32:1     |
| TAG 42:0  | TAG 52:3 | TAG 50:5  | DAG 30:1  | DAG 34:3 | pPE 34:1  | pPE 36:5  | pPE 42:5 | CE 18:1   | CE 18:3  | PE 36:0   | PE 34:1     |
| TAG 42:1  | TAG 54:1 | TAG 52:4  | DAG 32:0  | DAG 36:3 | pPE 34:2  | pPE 38:3  | pPE 42:6 |           | CE 20:3  |           | PE 34:2     |
| TAG 44:1  | TAG 54:2 | TAG 52:5  | DAG 32:1  | DAG 36:2 | pPE 34:3  | pPE 38:4  |          |           | CE 20:4  |           | PE 36:1     |
| TAG 46:0  | TAG 54:3 | TAG 52:6  | DAG 32:2  | DAG 36:3 | pPE 36:1  | pPE 38:5  |          |           | CE 20:5  |           | PE 36:2     |
| TAG 46:1  | TAG 56:1 | TAG 56:8  | DAG 34:0  | DAG 36:4 | pPE 36:2  | pPE 38:6  |          |           | CE 22:4  |           | PE 36:3     |
| TAG 46:2  | TAG 56:2 | TAG 54:4  | DAG 34:1  | DAG 36:5 | pPE 36:3  | pPE 40:4  |          |           | CE 22:5  |           | PE 36:4     |
| TAG 48:0  | TAG 56:3 | TAG 54:5  | DAG 36:1  | DGA 38:4 | PE 38:2   | pPE 40:5  |          |           | CE 22:6  |           | PE 36:5     |
| TAG 48:1  | TAG 56:4 | TAG 54:6  |           | DAG 38:5 |           | pPE 40:6  |          |           |          |           | PE 38:3     |
| TAG 48:2  |          | TAG 54:7  |           | DAG 38:6 |           |           |          |           |          |           | PE 38:4     |
| TAG 48:3  |          | TAG 54:8  |           | DAG 40:6 |           |           |          |           |          |           | PE 38:5     |
| TAG 50:0  |          | TAG 56:4  |           | DAG 40:7 |           |           |          |           |          |           | PE 40:6     |
| TAG 50:1  |          | TAG 56:5  |           |          |           |           |          |           |          |           |             |
| TAG 50:2  |          | TAG 56:6  |           |          |           |           |          |           |          |           |             |
| TAG 50:3  |          | TAG 56:7  |           |          |           |           |          |           |          |           |             |
| TAG 52:0  |          | TAG 56:8  |           |          |           |           |          |           |          |           |             |
| TAG 52:1  |          | TAG 56:9  |           |          |           |           |          |           |          |           |             |
| TAG 56:0  |          | TAG 58:5  |           |          |           |           |          |           |          |           |             |
| TAG 58:1  |          | TAG 58:6  |           |          |           |           |          |           |          |           |             |
|           |          | TAG 58:7  |           |          |           |           |          |           |          |           |             |
|           |          | TAG 58:8  |           |          |           |           |          |           |          |           |             |
|           |          | TAG 58:9  |           |          |           |           |          |           |          |           |             |
|           |          | TAG 58:10 |           |          |           |           |          |           |          |           |             |

| FFA       |             | AC           |         |
|-----------|-------------|--------------|---------|
| Saturated | Unsaturated | Intermediate | Long    |
| FFA 16:0  | FFA 18:1    | AC 8:0       | AC 16:0 |
| FFA 18:0  | FFA 18:2    | AC 8:1       | AC 16:1 |
| FFA 20:0  | FFA 20:1    | AC 10:0      | AC 18:0 |
| FFA 22:0  | FFA 20:2    | AC10:1       | AC 18:1 |
|           | FFA 20:4    | AC 12:0      | AC 18:2 |
|           | FFA 22:1    | AC 12:1      | AC 20:0 |
|           | FFA 22:2    | AC 14:0      | AC 20:1 |
|           | FFA 22:3    | AC 14:1      | AC 20:2 |
|           |             | AC 14:2      | AC 20:3 |
|           |             |              | AC 20:4 |

AC, acylcarnitines; CE, cholesterol esters; DAG, diacylglycerol; FFA, free fatty acids; HDB, high double bond; LDB, low double bond; LPC, lyso-PC; PC, phosphatidylcholine; PE, phosphatidylethanolamine; pPE, plasmenyl-PE; SM, sphingomyelin; TAG, triacylglycerol. ; x:y, number of carbons:number of double bonds.

**Supplement Table 3:** Categories of chain length and double bond applied for generation of differential networks presented in Figure 7.

| lipid            | Chain length | Double bond | Double bond and chain length |
|------------------|--------------|-------------|------------------------------|
| L-Carnitine (LC) |              |             |                              |
| AC 2:0           | AC bottom    | NA          | AC bottom                    |
| AC 3:0           | AC bottom    | NA          | AC bottom                    |
| AC 4:0           | AC bottom    | NA          | AC bottom                    |
| AC 5:0           | AC bottom    | NA          | AC bottom                    |
| AC 6:0           | AC middle    | NA          | AC middle                    |
| AC 8:0           | AC middle    | NA          | AC middle                    |
| AC 8:1           | AC middle    | NA          | AC middle                    |
| AC 10:0          | AC middle    | NA          | AC middle                    |
| AC 10:1          | AC middle    | NA          | AC middle                    |
| AC 20:0          | AC middle    | NA          | AC middle                    |
| AC 20:0-OH       | AC middle    | NA          | AC middle                    |
| AC 12:1          | AC middle    | NA          | AC middle                    |
| AC 14:0          | AC middle    | NA          | AC middle                    |
| AC 14:0-OH       | AC middle    | NA          | AC middle                    |
| AC 14:1          | AC middle    | NA          | AC middle                    |
| AC 14:2          | AC middle    | NA          | AC middle                    |
| AC 16:0          | AC top       | NA          | AC top                       |
| AC 16:0-OH       | AC top       | NA          | AC top                       |
| AC 16:1          | AC top       | NA          | AC top                       |
| AC 18:0          | AC top       | NA          | AC top                       |
| AC 18:1          | AC top       | NA          | AC top                       |
| AC 18:2          | AC top       | NA          | AC top                       |
| AC 18:2-OH       | AC top       | NA          | AC top                       |
| AC 20:0          | AC top       | NA          | AC top                       |
| AC 20:1          | AC top       | NA          | AC top                       |
| AC 20:2          | AC top       | NA          | AC top                       |
| AC 20:3          | AC top       | NA          | AC top                       |
| AC 20:4          | AC top       | NA          | AC top                       |
| CE 16:0          | CE bottom    | CE low      | CE low bottom                |
| CE 16:1          | CE bottom    | CE low      | CE low bottom                |
| CE 18:0          | CE middle    | CE low      | CE low middle                |
| CE 18:1          | CE middle    | CE low      | CE low middle                |
| CE 18:2          | CE middle    | CE high     | CE high middle               |
| CE 18:3          | CE middle    | CE high     | CE high middle               |
| CE 20:3          | CE top       | CE high     | CE high top                  |
| CE 20:4          | CE top       | CE high     | CE high top                  |
| CE 20:5          | CE top       | CE high     | CE high top                  |
| CE 22:4          | CE top       | CE high     | CE high top                  |
| CE 22:5          | CE top       | CE high     | CE high top                  |

| <b>lipid</b> | <b>Chain length</b> | <b>Double bond</b> | <b>Double bond and chain length</b> |
|--------------|---------------------|--------------------|-------------------------------------|
| CE 22:6      | CE top              | CE high            | CE high top                         |
| DAG 26:0     | DAG bottom          | DAG low            | DAG low bottom                      |
| DAG 30:0     | DAG bottom          | DAG low            | DAG low bottom                      |
| DAG 30:1     | DAG bottom          | DAG low            | DAG low bottom                      |
| DAG 32:0     | DAG bottom          | DAG low            | DAG low bottom                      |
| DAG 32:1     | DAG bottom          | DAG low            | DAG low bottom                      |
| DAG 32:2     | DAG bottom          | DAG high           | DAG high bottom                     |
| DAG 34:0     | DAG middle          | DAG low            | DAG low middle                      |
| DAG 34:1     | DAG middle          | DAG low            | DAG low middle                      |
| DAG 34:2     | DAG middle          | DAG high           | DAG high middle                     |
| DAG 34:3     | DAG middle          | DAG high           | DAG high middle                     |
| DAG 36:0     | DAG middle          | DAG low            | DAG low middle                      |
| DAG 36:1     | DAG middle          | DAG low            | DAG low middle                      |
| DAG 36:2     | DAG middle          | DAG high           | DAG high middle                     |
| DAG 36:3     | DAG middle          | DAG high           | DAG high middle                     |
| DAG 36:4     | DAG middle          | DAG high           | DAG high middle                     |
| DAG 36:5     | DAG middle          | DAG high           | DAG high middle                     |
| DAG 38:1     | DAG middle          | DAG low            | DAG low middle                      |
| DAG 38:2     | DAG middle          | DAG high           | DAG high middle                     |
| DAG 38:4     | DAG middle          | DAG high           | DAG high middle                     |
| DAG 38:5     | DAG middle          | DAG high           | DAG high middle                     |
| DAG 38:6     | DAG middle          | DAG high           | DAG high middle                     |
| DAG 38:7     | DAG middle          | DAG high           | DAG high middle                     |
| DAG 40:6     | DAG top             | DAG high           | DAG high top                        |
| DAG 40:7     | DAG top             | DAG high           | DAG high top                        |
| FFA 16:0     | FFA                 | FFA low            | FFA low NA                          |
| FFA 18:0     | FFA                 | FFA low            | FFA low NA                          |
| FFA 18:1     | FFA                 | FFA low            | FFA low NA                          |
| FFA 18:2     | FFA                 | FFA high           | FFA high NA                         |
| FFA 20:0     | FFA                 | FFA low            | FFA low NA                          |
| FFA 20:1     | FFA                 | FFA low            | FFA low NA                          |
| FFA 20:2     | FFA                 | FFA high           | FFA high NA                         |
| FFA 20:4     | FFA                 | FFA high           | FFA high NA                         |
| FFA 22:0     | FFA                 | FFA low            | FFA low NA                          |
| FFA 22:1     | FFA                 | FFA low            | FFA low NA                          |
| FFA 22:2     | FFA                 | FFA high           | FFA high NA                         |
| FFA 22:3     | FFA                 | FFA high           | FFA high NA                         |
| FFA 24:0     | FFA                 | FFA low            | FFA low NA                          |
| FFA 24:1     | FFA                 | FFA low            | FFA low NA                          |
| FFA 24:2     | FFA                 | FFA high           | FFA high NA                         |
| FFA 24:3     | FFA                 | FFA high           | FFA high NA                         |
| lysoPC 14:0  | lysoPC bottom       | lysoPC low         | lysoPC low bottom                   |
| lysoPC 16:0  | lysoPC bottom       | lysoPC low         | lysoPC low bottom                   |

| <b>lipid</b> | <b>Chain length</b> | <b>Double bond</b> | <b>Double bond and chain length</b> |
|--------------|---------------------|--------------------|-------------------------------------|
| lysoPC 16:1  | lysoPC bottom       | lysoPC low         | lysoPC low bottom                   |
| lysoPC 18:0  | lysoPC middle       | lysoPC low         | lysoPC low middle                   |
| lysoPC 18:1  | lysoPC middle       | lysoPC low         | lysoPC low middle                   |
| lysoPC 18:2  | lysoPC middle       | lysoPC high        | lysoPC high middle                  |
| lysoPC 18:3  | lysoPC middle       | lysoPC high        | lysoPC high middle                  |
| lysoPC 20:0  | lysoPC middle       | lysoPC low         | lysoPC low middle                   |
| lysoPC 20:1  | lysoPC middle       | lysoPC low         | lysoPC low middle                   |
| lysoPC 20:2  | lysoPC middle       | lysoPC high        | lysoPC high middle                  |
| lysoPC 20:3  | lysoPC middle       | lysoPC high        | lysoPC high middle                  |
| lysoPC 20:4  | lysoPC middle       | lysoPC high        | lysoPC high middle                  |
| lysoPC 20:5  | lysoPC middle       | lysoPC high        | lysoPC high middle                  |
| lysoPC 22:4  | lysoPC middle       | lysoPC high        | lysoPC high middle                  |
| lysoPC 22:5  | lysoPC middle       | lysoPC high        | lysoPC high middle                  |
| lysoPC 22:6  | lysoPC middle       | lysoPC high        | lysoPC high middle                  |
| lysoPC 24:0  | lysoPC top          | lysoPC low         | lysoPC low top                      |
| lysoPE 16:0  | lysoPE bottom       | lysoPE low         | lysoPE low bottom                   |
| lysoPE 18:0  | lysoPE bottom       | lysoPE low         | lysoPE low bottom                   |
| lysoPE 18:1  | lysoPE bottom       | lysoPE low         | lysoPE low bottom                   |
| lysoPE 18:2  | lysoPE bottom       | lysoPE high        | lysoPE high bottom                  |
| lysoPE 20:4  | lysoPE middle       | lysoPE high        | lysoPE high middle                  |
| lysoPE 22:6  | lysoPC top          | lysoPE high        | lysoPE high top                     |
| PC 30:0      | PC middle           | PC low             | PC low middle                       |
| PC 30:1      | PC middle           | PC low             | PC low middle                       |
| PC 30:2      | PC middle           | PC high            | PC high middle                      |
| PC 32:0      | PC middle           | PC low             | PC low middle                       |
| PC 32:1      | PC middle           | PC low             | PC low middle                       |
| PC 32:2      | PC middle           | PC high            | PC high middle                      |
| PC 32:3      | PC middle           | PC high            | PC high middle                      |
| PC 34:0      | PC middle           | PC low             | PC low middle                       |
| PC 34:1      | PC middle           | PC low             | PC low middle                       |
| PC 34:2      | PC middle           | PC high            | PC high middle                      |
| PC 34:3      | PC middle           | PC high            | PC high middle                      |
| PC 34:4      | PC middle           | PC high            | PC high middle                      |
| PC 36:1      | PC middle           | PC low             | PC low middle                       |
| PC 36:2      | PC middle           | PC high            | PC high middle                      |
| PC 36:3      | PC middle           | PC high            | PC high middle                      |
| PC 36:4      | PC middle           | PC high            | PC high middle                      |
| PC 36:5      | PC middle           | PC high            | PC high middle                      |
| PC 36:6      | PC middle           | PC high            | PC high middle                      |
| PC 38:2      | PC top              | PC high            | PC high top                         |
| PC 38:3      | PC top              | PC high            | PC high top                         |
| PC 38:4      | PC top              | PC high            | PC high top                         |
| PC 38:5      | PC top              | PC high            | PC high top                         |



| <b>lipid</b>    | <b>Chain length</b> | <b>Double bond</b> | <b>Double bond and chain length</b> |
|-----------------|---------------------|--------------------|-------------------------------------|
| PC 38:6         | PC top              | PC high            | PC high top                         |
| PC 38:7         | PC top              | PC high            | PC high top                         |
| PC 38:8         | PC top              | PC high            | PC high top                         |
| PC 40:10        | PC top              | PC high            | PC high top                         |
| PC 40:4         | PC top              | PC high            | PC high top                         |
| PC 40:5         | PC top              | PC high            | PC high top                         |
| PC 40:6         | PC top              | PC high            | PC high top                         |
| PC 40:7         | PC top              | PC high            | PC high top                         |
| PC 40:8         | PC top              | PC high            | PC high top                         |
| PC 40:9         | PC top              | PC high            | PC high top                         |
| PC 42:10        | PC top              | PC high            | PC high top                         |
| PE 32:1         | PE bottom           | PE low             | PE low bottom                       |
| PE 34:0         | PE middle           | PE low             | PE low middle                       |
| PE 34:1         | PE middle           | PE low             | PE low middle                       |
| PE 34:2         | PE middle           | PE high            | PE high middle                      |
| PE 34:3         | PE middle           | PE high            | PE high middle                      |
| PE 36:0         | PE middle           | PE low             | PE low middle                       |
| PE 36:1         | PE middle           | PE low             | PE low middle                       |
| PE 36:2         | PE middle           | PE high            | PE high middle                      |
| PE 36:3         | PE middle           | PE high            | PE high middle                      |
| PE 36:4         | PE middle           | PE high            | PE high middle                      |
| PE 36:5         | PE middle           | PE high            | PE high middle                      |
| PE 38:2         | PE middle           | PE high            | PE high middle                      |
| PE 38:3         | PE middle           | PE high            | PE high middle                      |
| PE 38:4         | PE middle           | PE high            | PE high middle                      |
| PE 38:5         | PE middle           | PE high            | PE high middle                      |
| PE 38:6         | PE middle           | PE high            | PE high middle                      |
| PE 40:4         | PE top              | PE high            | PE high top                         |
| PE 40:5         | PE top              | PE high            | PE high top                         |
| PE 40:6         | PE top              | PE high            | PE high top                         |
| PE 40:7         | PE top              | PE high            | PE high top                         |
| PE 40:8         | PE top              | PE high            | PE high top                         |
| PI 32:1         | PI bottom           | PI low             | PI low bottom                       |
| PI 34:2         | PI bottom           | PI high            | PI high bottom                      |
| PI 36:2         | PI middle           | PI high            | PI high middle                      |
| PI 36:3         | PI middle           | PI high            | PI high middle                      |
| PI 36:4         | PI middle           | PI high            | PI high middle                      |
| PI 38:3         | PI middle           | PI high            | PI high middle                      |
| PI 38:4         | PI middle           | PI high            | PI high middle                      |
| PI 38:5         | PI middle           | PI high            | PI high middle                      |
| plasmeylPE 32:1 | plasmeylPE bottom   | plasmeylPE low     | plasmeylPE low bottom               |
| plasmeylPE 34:1 | plasmeylPE bottom   | plasmeylPE low     | plasmeylPE low bottom               |
| plasmeylPE 34:2 | plasmeylPE bottom   | plasmeylPE high    | plasmeylPE high bottom              |

| <b>lipid</b>    | <b>Chain length</b> | <b>Double bond</b> | <b>Double bond and chain length</b> |
|-----------------|---------------------|--------------------|-------------------------------------|
| plasmeylPE 34:3 | plasmeylPE bottom   | plasmeylPE high    | plasmeylPE high bottom              |
| plasmeylPE 36:1 | plasmeylPE middle   | plasmeylPE low     | plasmeylPE low middle               |
| plasmeylPE 36:2 | plasmeylPE middle   | plasmeylPE high    | plasmeylPE high middle              |
| plasmeylPE 36:3 | plasmeylPE middle   | plasmeylPE high    | plasmeylPE high middle              |
| plasmeylPE 36:4 | plasmeylPE middle   | plasmeylPE high    | plasmeylPE high middle              |
| plasmeylPE 36:5 | plasmeylPE middle   | plasmeylPE high    | plasmeylPE high middle              |
| plasmeylPE 38:1 | plasmeylPE middle   | plasmeylPE low     | plasmeylPE low middle               |
| plasmeylPE 38:2 | plasmeylPE middle   | plasmeylPE high    | plasmeylPE high middle              |
| plasmeylPE 38:3 | plasmeylPE middle   | plasmeylPE high    | plasmeylPE high middle              |
| plasmeylPE 38:4 | plasmeylPE middle   | plasmeylPE high    | plasmeylPE high middle              |
| plasmeylPE 38:5 | plasmeylPE middle   | plasmeylPE high    | plasmeylPE high middle              |
| plasmeylPE 38:6 | plasmeylPE middle   | plasmeylPE high    | plasmeylPE high middle              |
| plasmeylPE 40:4 | plasmeylPE top      | plasmeylPE high    | plasmeylPE high top                 |
| plasmeylPE 40:5 | plasmeylPE top      | plasmeylPE high    | plasmeylPE high top                 |
| plasmeylPE 40:6 | plasmeylPE top      | plasmeylPE high    | plasmeylPE high top                 |
| plasmeylPE 42:5 | plasmeylPE top      | plasmeylPE high    | plasmeylPE high top                 |
| plasmeylPE 42:6 | plasmeylPE top      | plasmeylPE high    | plasmeylPE high top                 |
| SM 30:1         | SM bottom           | SM low             | SM low bottom                       |
| SM 32:0         | SM bottom           | SM low             | SM low bottom                       |
| SM 32:1         | SM bottom           | SM low             | SM low bottom                       |
| SM 32:2         | SM bottom           | SM high            | SM high bottom                      |
| SM 34:1         | SM bottom           | SM low             | SM low bottom                       |
| SM 34:2         | SM bottom           | SM high            | SM high bottom                      |
| SM 36:1         | SM middle           | SM low             | SM low middle                       |
| SM 36:2         | SM middle           | SM high            | SM high middle                      |
| SM 38:0         | SM middle           | SM low             | SM low middle                       |
| SM 38:1         | SM middle           | SM low             | SM low middle                       |
| SM 38:2         | SM middle           | SM high            | SM high middle                      |
| SM 38:4         | SM middle           | SM high            | SM high middle                      |
| SM 40:1         | SM top              | SM low             | SM low top                          |
| SM 40:2         | SM top              | SM high            | SM high top                         |
| SM 42:1         | SM top              | SM low             | SM low top                          |
| SM 42:2         | SM top              | SM high            | SM high top                         |
| SM 42:4         | SM top              | SM high            | SM high top                         |
| SM 42:5         | SM top              | SM high            | SM high top                         |
| SM 44:1         | SM top              | SM low             | SM low top                          |
| SM 44:2         | SM top              | SM high            | SM high top                         |
| TAG 40:0        | TAG bottom          | TAG low            | TAG low bottom                      |
| TAG 42:0        | TAG bottom          | TAG low            | TAG low bottom                      |
| TAG 42:1        | TAG bottom          | TAG low            | TAG low bottom                      |
| TAG 44:1        | TAG bottom          | TAG low            | TAG low bottom                      |
| TAG 46:0        | TAG bottom          | TAG low            | TAG low bottom                      |
| TAG 46:1        | TAG bottom          | TAG low            | TAG low bottom                      |

| <b>lipid</b> | <b>Chain length</b> | <b>Double bond</b> | <b>Double bond and chain length</b> |
|--------------|---------------------|--------------------|-------------------------------------|
| TAG 46:2     | TAG bottom          | TAG high           | TAG high bottom                     |
| TAG 48:0     | TAG bottom          | TAG low            | TAG low bottom                      |
| TAG 48:1     | TAG bottom          | TAG low            | TAG low bottom                      |
| TAG 48:2     | TAG bottom          | TAG high           | TAG high bottom                     |
| TAG 48:3     | TAG bottom          | TAG high           | TAG high bottom                     |
| TAG 50:0     | TAG middle          | TAG low            | TAG low middle                      |
| TAG 50:1     | TAG middle          | TAG low            | TAG low middle                      |
| TAG 50:2     | TAG middle          | TAG high           | TAG high middle                     |
| TAG 50:3     | TAG middle          | TAG high           | TAG high middle                     |
| TAG 50:4     | TAG middle          | TAG high           | TAG high middle                     |
| TAG 50:5     | TAG middle          | TAG high           | TAG high middle                     |
| TAG 52:0     | TAG middle          | TAG low            | TAG low middle                      |
| TAG 52:1     | TAG middle          | TAG low            | TAG low middle                      |
| TAG 52:2     | TAG middle          | TAG high           | TAG high middle                     |
| TAG 52:3     | TAG middle          | TAG high           | TAG high middle                     |
| TAG 52:4     | TAG middle          | TAG high           | TAG high middle                     |
| TAG 52:5     | TAG middle          | TAG high           | TAG high middle                     |
| TAG 52:6     | TAG middle          | TAG high           | TAG high middle                     |
| TAG 54:1     | TAG middle          | TAG low            | TAG low middle                      |
| TAG 54:2     | TAG middle          | TAG high           | TAG high middle                     |
| TAG 54:3     | TAG middle          | TAG high           | TAG high middle                     |
| TAG 54:4     | TAG middle          | TAG high           | TAG high middle                     |
| TAG 54:5     | TAG middle          | TAG high           | TAG high middle                     |
| TAG 54:6     | TAG middle          | TAG high           | TAG high middle                     |
| TAG 54:7     | TAG middle          | TAG high           | TAG high middle                     |
| TAG 54:8     | TAG middle          | TAG high           | TAG high middle                     |
| TAG 56:0     | TAG middle          | TAG low            | TAG low middle                      |
| TAG 56:1     | TAG middle          | TAG low            | TAG low middle                      |
| TAG 56:2     | TAG middle          | TAG high           | TAG high middle                     |
| TAG 56:3     | TAG middle          | TAG high           | TAG high middle                     |
| TAG 56:4     | TAG middle          | TAG high           | TAG high middle                     |
| TAG 56:5     | TAG middle          | TAG high           | TAG high middle                     |
| TAG 56:6     | TAG middle          | TAG high           | TAG high middle                     |
| TAG 56:7     | TAG middle          | TAG high           | TAG high middle                     |
| TAG 56:8     | TAG middle          | TAG high           | TAG high middle                     |
| TAG 56:9     | TAG middle          | TAG high           | TAG high middle                     |
| TAG 58:1     | TAG top             | TAG low            | TAG low top                         |
| TAG 58:10    | TAG top             | TAG high           | TAG high top                        |
| TAG 58:3     | TAG top             | TAG high           | TAG high top                        |
| TAG 58:5     | TAG top             | TAG high           | TAG high top                        |
| TAG 58:6     | TAG top             | TAG high           | TAG high top                        |
| TAG 58:7     | TAG top             | TAG high           | TAG high top                        |
| TAG 58:8     | TAG top             | TAG high           | TAG high top                        |

| <b>lipid</b> | <b>Chain length</b> | <b>Double bond</b> | <b>Double bond and chain length</b> |
|--------------|---------------------|--------------------|-------------------------------------|
| TAG 58:9     | TAG top             | TAG high           | TAG high top                        |
| TAG 60:12    | TAG top             | TAG high           | TAG high top                        |
| TAG 62:1     | TAG top             | TAG low            | TAG low top                         |

AC, acylcarnitines; CE, cholesterol esters; DAG, diacylglycerol; FFA, free fatty acids; PC, phosphatidylcholine; PE, phosphatidylethanolamine; SM, sphingomyelin; TAG, triacylglycerol; x:y, number of carbons:number of double bonds.

**Supplement Table 4:** False discovery rate (FDR) adjusted serum lipid correlations with lipid regulating gene transcripts in glomerular compartment, which revealed a link between serum lipids and genes involved in fatty acids synthesis and metabolism regulation of complex lipids. Rows that show genes involved in fatty acid metabolism are highlighted.

| Pathway                                   | Gene symbol | Lipid           | Correlation |                                                                                     | p.value | FDR     |
|-------------------------------------------|-------------|-----------------|-------------|-------------------------------------------------------------------------------------|---------|---------|
| Linoleate Metabolism                      | PLA2G4B     | AC_Long.PCA     | -0.44       |    | 0.00047 | 0.01088 |
| Glycerophospholipid metabolism            | PLA2G12A    | AC_Long.PCA     | 0.43        |    | 0.00068 | 0.01409 |
| Butanoate metabolism                      | HMGCS1      | AC_Long.PCA     | -0.43       |    | 0.00079 | 0.01551 |
| Glycosphingolipid metabolism              | CERK        | FFA.Saturated   | 0.42        |    | 0.00094 | 0.01751 |
| P21 activated kinase                      | PAK2        | AC_Long.PCA     | -0.41       |    | 0.00161 | 0.02540 |
| ras homolog family member B               | RHOB        | DAG.Short.LDB   | -0.40       |    | 0.00168 | 0.02623 |
| ras homolog family member B               | RHOB        | TAG.Short.LDB   | -0.39       |    | 0.00272 | 0.03601 |
| De novo fatty acid biosynthesis           | PNPLA3      | FFA.Saturated   | -0.37       |    | 0.00382 | 0.04459 |
| Glycerophospholipid metabolism            | PCYT1B      | TAG.Int.HDB     | 0.37        |    | 0.00384 | 0.04467 |
| Phosphatidylinositol phosphate metabolism | PLCB1       | DAG.Short.LDB   | -0.37       |    | 0.00404 | 0.04607 |
| Glycerophospholipid metabolism            | PISD        | TAG.Int.HDB     | -0.37       |    | 0.00426 | 0.04760 |
| Cholesterol metabolism                    | NSDHL       | TAG.Int.LDB     | 0.37        |    | 0.00428 | 0.04769 |
| P21 activated kinase                      | PAK2        | DAG.Short.LDB   | -0.37       |    | 0.00455 | 0.04955 |
| Butanoate metabolism                      | HMGCR       | AC_Long.PCA     | -0.36       |    | 0.00523 | 0.05422 |
| Sphingomyelin metabolism                  | SMPD3       | FFA.Unsaturated | 0.36        |    | 0.00530 | 0.05469 |
| Glycerophospholipid metabolism            | PAFAH1B1    | AC_Long.PCA     | -0.36       |    | 0.00593 | 0.05837 |
| Steroid hormone biosynthesis              | SULT1E1     | AC_Long.PCA     | 0.36        |    | 0.00599 | 0.05869 |
| Phosphatidylinositol phosphate metabolism | PIK3CB      | TAG.Int.LDB     | -0.36       |    | 0.00600 | 0.05869 |
| O-Glycan biosynthesis                     | GALNT2      | DAG.Long.HDB    | 0.36        |   | 0.00609 | 0.05923 |
| De novo fatty acid biosynthesis           | ACACA       | DAG.Long.HDB    | 0.36        |  | 0.00616 | 0.05967 |
| Phosphatidylinositol phosphate metabolism | PLCB1       | TAG.Short.LDB   | -0.35       |  | 0.00632 | 0.06059 |
| Linoleate Metabolism                      | PLA2G3      | AC_Long.PCA     | 0.35        |  | 0.00640 | 0.06109 |
| Beta-oxidation                            | PPT1        | TAG.Int.LDB     | 0.35        |  | 0.00651 | 0.06170 |
| Glycerophospholipid metabolism            | LYPLA2      | AC_Long.PCA     | 0.35        |  | 0.00661 | 0.06237 |
| Cholesterol metabolism                    | IDI1        | AC_Long.PCA     | -0.35       |  | 0.00776 | 0.06923 |
| Butanoate metabolism                      | HMGCS1      | FFA.Saturated   | 0.34        |  | 0.00861 | 0.07413 |
| Glycerophospholipid metabolism            | GLA         | DAG.Short.LDB   | 0.34        |  | 0.00924 | 0.07734 |
| Ceramide metabolism                       | CERS2       | FFA.Saturated   | -0.34       |  | 0.00984 | 0.08015 |
| Beta-oxidation                            | ACOX3       | AC_Int.PCA      | 0.33        |  | 0.01031 | 0.08237 |
| Cholesterol metabolism                    | FDPS        | TAG.Int.LDB     | 0.33        |  | 0.01053 | 0.08363 |
| Beta-oxidation                            | ACOX3       | FFA.Saturated   | 0.33        |  | 0.01072 | 0.08467 |
| Butanoate metabolism                      | HMGCS1      | DAG.Long.HDB    | 0.33        |  | 0.01072 | 0.08471 |
| Glycerophospholipid metabolism            | PNPLA6      | AC_Long.PCA     | -0.33       |  | 0.01104 | 0.08627 |
| De novo fatty acid biosynthesis           | ACACA       | TAG.Int.HDB     | 0.33        |  | 0.01258 | 0.09345 |
| Beta-oxidation                            | ACSL1       | TAG.Short.LDB   | 0.32        |  | 0.01284 | 0.09442 |
| De novo fatty acid biosynthesis           | MCAT        | TAG.Short.LDB   | 0.32        |  | 0.01289 | 0.09458 |
| Glycerophospholipid metabolism            | LPL         | TAG.Int.HDB     | -0.32       |  | 0.01336 | 0.09662 |
| Growth factor                             | PDGFA       | FFA.Unsaturated | -0.32       |  | 0.01340 | 0.09675 |
| serine-threonine kinase                   | AKT1        | AC_Long.PCA     | -0.32       |  | 0.01348 | 0.09701 |
| Glycerophospholipid metabolism            | PCYT1B      | DAG.Long.HDB    | 0.32        |  | 0.01349 | 0.09703 |
| Glycosphingolipid metabolism              | FUT2        | DAG.Long.HDB    | -0.32       |  | 0.01370 | 0.09790 |
| Cholesterol metabolism                    | CYP51       | FFA.Saturated   | 0.32        |  | 0.01410 | 0.09968 |
| GTPase-activating protein                 | ARHGAP35    | AC_Long.PCA     | -0.32       |  | 0.01416 | 0.09987 |

Cont...

|                                           |          |                 |       |  |  |         |         |
|-------------------------------------------|----------|-----------------|-------|--|--|---------|---------|
| Phosphatidylinositol phosphate metabolism | PIK3CD   | FFA.Saturated   | -0.32 |  |  | 0.01443 | 0.10123 |
| Glycerophospholipid metabolism            | AGPAT4   | AC_Long.PCA     | -0.32 |  |  | 0.01496 | 0.10359 |
| Glycerophospholipid metabolism            | GLA      | FFA.Unsaturated | 0.32  |  |  | 0.01514 | 0.10424 |
| GTPase-activating protein                 | ARHGAP1  | TAG.Short.LDB   | -0.32 |  |  | 0.01531 | 0.10504 |
| Growth factor                             | PDGFA    | DAG.Long.HDB    | -0.32 |  |  | 0.01564 | 0.10638 |
| Cholesterol metabolism                    | SC4MOL   | AC_Long.PCA     | -0.31 |  |  | 0.01651 | 0.11014 |
| O-Glycan biosynthesis                     | GALNT2   | TAG.Int.HDB     | 0.31  |  |  | 0.01668 | 0.11095 |
| Glycerophospholipid metabolism            | PAFAH1B3 | FFA.Unsaturated | -0.31 |  |  | 0.01669 | 0.11097 |
| Cholesterol metabolism                    | PMVK     | DAG.Short.LDB   | 0.31  |  |  | 0.01711 | 0.11254 |
| Glycerophospholipid metabolism            | LCAT     | AC_Long.PCA     | -0.31 |  |  | 0.01835 | 0.11761 |
| Cholesterol metabolism                    | LSS      | FFA.Saturated   | 0.31  |  |  | 0.01855 | 0.11839 |
| Glycosphingolipid metabolism              | FUT1     | AC_Long.PCA     | -0.31 |  |  | 0.01870 | 0.11891 |
| Glycosphingolipid metabolism              | UGT8     | TAG.Int.LDB     | -0.30 |  |  | 0.01994 | 0.12345 |
| Glycosphingolipid metabolism              | STT3A    | DAG.Short.LDB   | -0.30 |  |  | 0.02012 | 0.12419 |
| P21 activated kinase                      | PAK2     | TAG.Short.LDB   | -0.30 |  |  | 0.02014 | 0.12424 |
| Glycerophospholipid metabolism            | GLA      | TAG.Int.LDB     | 0.30  |  |  | 0.02046 | 0.12549 |
| Glycan biosynthesis                       | FUT8     | DAG.Short.LDB   | -0.30 |  |  | 0.02069 | 0.12617 |
| Beta-oxidation                            | GCDH     | TAG.Short.LDB   | 0.30  |  |  | 0.02085 | 0.12665 |
| P21 activated kinase                      | PAK4     | TAG.Int.HDB     | 0.30  |  |  | 0.02233 | 0.13228 |
| Phosphatidylinositol phosphate metabolism | PLCG2    | FFA.Saturated   | -0.30 |  |  | 0.02368 | 0.13720 |
| Phosphatidylinositol phosphate metabolism | PLCB4    | AC_Long.PCA     | -0.30 |  |  | 0.02385 | 0.13763 |
| Beta-oxidation                            | CPT2     | TAG.Short.LDB   | 0.29  |  |  | 0.02476 | 0.14053 |
| De novo fatty acid biosynthesis           | ACACA    | AC_Long.PCA     | -0.29 |  |  | 0.02514 | 0.14176 |
| Glycerophospholipid metabolism            | GNPAT    | DAG.Short.LDB   | 0.29  |  |  | 0.02515 | 0.14179 |
| Sphingomyelin metabolism                  | S1PR4    | AC_Int.PCA      | -0.29 |  |  | 0.02561 | 0.14364 |
| Glycosphingolipid metabolism              | CHMP4A   | AC_Long.PCA     | 0.29  |  |  | 0.02566 | 0.14370 |
| Cholesterol metabolism                    | FDFT1    | AC_Long.PCA     | -0.29 |  |  | 0.02642 | 0.14636 |
| Phosphatidylinositol phosphate metabolism | PLCG2    | FFA.Unsaturated | 0.29  |  |  | 0.02645 | 0.14644 |
| Glycosphingolipid metabolism              | PTDSS1   | FFA.Unsaturated | -0.29 |  |  | 0.02645 | 0.14644 |
| P21 activated kinase                      | PAK4     | DAG.Long.HDB    | 0.29  |  |  | 0.02672 | 0.14728 |
| Butanoate metabolism                      | HMGCR    | FFA.Saturated   | 0.29  |  |  | 0.02717 | 0.14868 |
| Glycerophospholipid metabolism            | PCYT1A   | AC_Int.PCA      | 0.29  |  |  | 0.02848 | 0.15301 |
| De novo fatty acid biosynthesis           | OXSM     | TAG.Short.LDB   | 0.29  |  |  | 0.02862 | 0.15343 |
| Glycan biosynthesis                       | GALNT3   | FFA.Unsaturated | -0.29 |  |  | 0.02870 | 0.15366 |
| GTPase-activating protein                 | ARHGAP1  | DAG.Short.LDB   | -0.28 |  |  | 0.03013 | 0.15889 |
| Glycan biosynthesis                       | GALNT3   | TAG.Int.HDB     | 0.28  |  |  | 0.03017 | 0.15895 |
| Cholesterol metabolism                    | EBP      | TAG.Short.LDB   | 0.28  |  |  | 0.03017 | 0.15897 |
| Glycosphingolipid metabolism              | CERK     | AC_Long.PCA     | -0.28 |  |  | 0.03067 | 0.16045 |
| Butanoate metabolism                      | HMGCS1   | DAG.Short.LDB   | -0.28 |  |  | 0.03093 | 0.16118 |
| Linoleate Metabolism                      | PLA2G4B  | FFA.Saturated   | 0.28  |  |  | 0.03107 | 0.16164 |
| Beta-oxidation                            | CPT2     | DAG.Short.LDB   | 0.28  |  |  | 0.03138 | 0.16254 |
| Glycerophospholipid metabolism            | CHPT1    | FFA.Saturated   | -0.28 |  |  | 0.03141 | 0.16260 |
| Glycosphingolipid metabolism              | PTDSS1   | TAG.Int.HDB     | -0.28 |  |  | 0.03239 | 0.16552 |
| Glycerophospholipid metabolism            | LPL      | DAG.Long.HDB    | -0.28 |  |  | 0.03269 | 0.16647 |
| Fatty acid desaturase                     | FADS1    | AC_Long.PCA     | -0.28 |  |  | 0.03275 | 0.16668 |
| Glycan biosynthesis                       | GALNT3   | DAG.Short.LDB   | -0.28 |  |  | 0.03311 | 0.16775 |

Cont...

|                                           |          |                 |       |  |  |         |         |
|-------------------------------------------|----------|-----------------|-------|--|--|---------|---------|
| Beta-oxidation                            | ACSL1    | DAG.Short.LDB   | 0.28  |  |  | 0.03370 | 0.16919 |
| Beta-oxidation                            | ACAA2    | TAG.Short.LDB   | 0.28  |  |  | 0.03372 | 0.16926 |
| Glycerophospholipid metabolism            | AGPAT1   | FFA.Unsaturated | -0.28 |  |  | 0.03376 | 0.16940 |
| fucosyltransferase                        | FUT7     | AC_Long.PCA     | 0.28  |  |  | 0.03471 | 0.17201 |
| Propanoate Metabolism                     | MLYCD    | DAG.Short.LDB   | 0.28  |  |  | 0.03477 | 0.17218 |
| De novo fatty acid biosynthesis           | MCAT     | DAG.Short.LDB   | 0.28  |  |  | 0.03478 | 0.17222 |
| Butanoate metabolism                      | HMGCS1   | TAG.Short.LDB   | -0.28 |  |  | 0.03507 | 0.17309 |
| Phosphatidylinositol phosphate metabolism | PLCB4    | FFA.Saturated   | 0.28  |  |  | 0.03537 | 0.17386 |
| Glycerophospholipid metabolism            | PLA2G7   | FFA.Unsaturated | -0.28 |  |  | 0.03599 | 0.17591 |
| Growth factor                             | PDGFRB   | FFA.Unsaturated | -0.28 |  |  | 0.03623 | 0.17654 |
| Glycerophospholipid metabolism            | PEMT     | DAG.Short.LDB   | 0.27  |  |  | 0.03729 | 0.17975 |
| Phosphatidylinositol phosphate metabolism | PLCB4    | DAG.Long.HDB    | 0.27  |  |  | 0.03762 | 0.18055 |
| Glycerophospholipid metabolism            | LIPG     | TAG.Short.LDB   | -0.27 |  |  | 0.03771 | 0.18072 |
| Glycerophospholipid metabolism            | PISD     | DAG.Long.HDB    | -0.27 |  |  | 0.03772 | 0.18072 |
| Cholesterol metabolism                    | LIPE     | FFA.Unsaturated | 0.27  |  |  | 0.03983 | 0.18620 |
| Ceramide metabolism                       | CERS5    | TAG.Int.LDB     | -0.27 |  |  | 0.04092 | 0.18897 |
| Glycerophospholipid metabolism            | LPL      | TAG.Short.LDB   | -0.27 |  |  | 0.04100 | 0.18910 |
| Glycan biosynthesis                       | GALNT14  | TAG.Short.LDB   | 0.27  |  |  | 0.04147 | 0.19023 |
| Cholesterol metabolism                    | DHCR7    | DAG.Long.HDB    | 0.27  |  |  | 0.04163 | 0.19062 |
| Beta-oxidation                            | ACOX3    | FFA.Unsaturated | 0.27  |  |  | 0.04184 | 0.19123 |
| Cholesterol metabolism                    | PMVK     | TAG.Short.LDB   | 0.27  |  |  | 0.04258 | 0.19324 |
| Glycosphingolipid metabolism              | STT3A    | TAG.Short.LDB   | -0.27 |  |  | 0.04274 | 0.19364 |
| Glycerophospholipid metabolism            | DGKG     | AC_Int.PCA      | 0.27  |  |  | 0.04309 | 0.19437 |
| Beta-oxidation                            | ACADSB   | TAG.Short.LDB   | 0.27  |  |  | 0.04361 | 0.19573 |
| Fatty acid metabolism                     | ACAD8    | AC_Long.PCA     | 0.26  |  |  | 0.04444 | 0.19782 |
| Linoleate Metabolism                      | PLA2G1B  | TAG.Int.LDB     | -0.26 |  |  | 0.04506 | 0.19930 |
| Cholesterol metabolism                    | SQLE     | DAG.Long.HDB    | 0.26  |  |  | 0.04551 | 0.20054 |
| De novo fatty acid biosynthesis           | OXSM     | DAG.Short.LDB   | 0.26  |  |  | 0.04588 | 0.20145 |
| Growth factor                             | PDGFD    | DAG.Short.LDB   | -0.26 |  |  | 0.04601 | 0.20187 |
| Glycosphingolipid metabolism              | B4GALT2  | AC_Int.PCA      | -0.26 |  |  | 0.04624 | 0.20246 |
| G protein                                 | GNAQ     | TAG.Int.LDB     | -0.26 |  |  | 0.04630 | 0.20256 |
| De novo fatty acid biosynthesis           | ACACB    | AC_Long.PCA     | -0.26 |  |  | 0.04716 | 0.20446 |
| Glycan biosynthesis                       | FUT8     | TAG.Short.LDB   | -0.26 |  |  | 0.04746 | 0.20513 |
| Linoleate Metabolism                      | PLA2G4A  | FFA.Saturated   | 0.26  |  |  | 0.04747 | 0.20517 |
| Beta-oxidation                            | HADHA    | TAG.Int.HDB     | 0.26  |  |  | 0.04755 | 0.20530 |
| serine-threonine kinase                   | AKT1     | DAG.Short.LDB   | -0.26 |  |  | 0.04778 | 0.20587 |
| Linoleate Metabolism                      | PLA2G10  | FFA.Unsaturated | 0.26  |  |  | 0.04814 | 0.20675 |
| Sphingomyelin metabolism                  | SMPDL3A  | AC_Long.PCA     | 0.26  |  |  | 0.04817 | 0.20682 |
| Cholesterol metabolism                    | CYP51    | TAG.Int.LDB     | 0.26  |  |  | 0.04833 | 0.20719 |
| Glycerophospholipid metabolism            | PAFAH1B3 | AC_Int.PCA      | -0.26 |  |  | 0.04857 | 0.20780 |
| Glycosphingolipid metabolism              | FUT1     | TAG.Short.LDB   | -0.26 |  |  | 0.04870 | 0.20811 |

Cont...

|                                           |          |               |       |                                                                                     |                                                                                     |         |         |
|-------------------------------------------|----------|---------------|-------|-------------------------------------------------------------------------------------|-------------------------------------------------------------------------------------|---------|---------|
| Beta-oxidation                            | HADHA    | TAG.Short.LDB | 0.26  |                                                                                     |  | 0.04899 | 0.20855 |
| Protein kinase                            | MAPK14   | AC_Long.PCA   | -0.26 |  |                                                                                     | 0.04919 | 0.20906 |
| Glycosphingolipid metabolism              | B4GALT2  | AC_Long.PCA   | -0.26 |  |                                                                                     | 0.04922 | 0.20915 |
| GTPase-activating protein                 | ARHGAP1  | FFA.Saturated | 0.26  |                                                                                     |  | 0.04982 | 0.21080 |
| Sphingomyelin metabolism                  | SMPD3    | AC_Long.PCA   | 0.26  |                                                                                     |  | 0.05004 | 0.21132 |
| GTPase-activating protein                 | ARHGAP35 | AC_Int.PCA    | -0.26 |  |                                                                                     | 0.05026 | 0.21194 |
| De novo fatty acid biosynthesis           | LYPLA3   | TAG.Int.LDB   | 0.26  |                                                                                     |  | 0.05032 | 0.21209 |
| Glycerophospholipid metabolism            | PNLIP    | AC_Long.PCA   | 0.26  |                                                                                     |  | 0.05063 | 0.21275 |
| Growth factor                             | PDGFRB   | DAG.Long.HDB  | -0.26 |  |                                                                                     | 0.05111 | 0.21373 |
| Phosphatidylinositol phosphate metabolism | CHKB     | TAG.Int.LDB   | 0.26  |                                                                                     |  | 0.05127 | 0.21405 |
| Butanoate metabolism                      | HMGCR    | DAG.Long.HDB  | 0.26  |                                                                                     |  | 0.05140 | 0.21442 |
| Glycerophospholipid metabolism            | CDS2     | AC_Long.PCA   | -0.26 |  |                                                                                     | 0.05150 | 0.21462 |
| Phosphatidylinositol phosphate metabolism | PLCG1    | TAG.Short.LDB | -0.26 |  |                                                                                     | 0.05180 | 0.21521 |
| Cholesterol metabolism                    | SQLE     | FFA.Saturated | 0.26  |                                                                                     |  | 0.05271 | 0.21744 |
| Growth factor                             | PDGFA    | DAG.Short.LDB | -0.26 |  |                                                                                     | 0.05331 | 0.21917 |
| Glycerophospholipid metabolism            | ETNK1    | AC_Int.PCA    | 0.25  |                                                                                     |  | 0.05376 | 0.22038 |
| Glycerophospholipid metabolism            | PEMT     | TAG.Int.LDB   | 0.25  |                                                                                     |  | 0.05378 | 0.22040 |
| Phosphatidylinositol phosphate metabolism | PIK3R1   | DAG.Long.HDB  | -0.25 |  |                                                                                     | 0.05380 | 0.22044 |
| Glycosphingolipid metabolism              | FUT5     | TAG.Int.LDB   | 0.25  |                                                                                     |  | 0.05467 | 0.22276 |



**Supplement Table 5:** False discovery rate (FDR) adjusted serum lipid correlations with lipid regulating gene transcripts in tubulointerstitial compartment, which revealed a link between serum lipids and genes involved in fatty acid synthesis and  $\beta$ -oxidation and metabolic regulation of complex lipids. Rows that show genes involved in fatty acid metabolism are highlighted.

| Pathway                                   | Gene symbol | Lipid           | Correlation |                                                                                       | p.value | FDR      |
|-------------------------------------------|-------------|-----------------|-------------|---------------------------------------------------------------------------------------|---------|----------|
| Cholesterol metabolism                    | DHCR7       | AC_Long.PCA     | -0.59       |    | 0.00003 | 0.001735 |
| Beta-oxidation                            | ACAT2       | AC_Long.PCA     | -0.56       |    | 0.00013 | 0.004339 |
| Phosphatidylinositol phosphate metabolism | GALNT7      | DAG.Short.LDB   | 0.55        |    | 0.00014 | 0.004457 |
| Glycerophospholipid metabolism            | PCYT2       | TAG.Short.LDB   | -0.55       |    | 0.00015 | 0.004666 |
| Phosphatidylinositol phosphate metabolism | SPHK2       | TAG.Short.LDB   | -0.54       |    | 0.00022 | 0.006133 |
| Cholesterol metabolism                    | IDI1        | AC_Long.PCA     | -0.53       |    | 0.00033 | 0.008047 |
| De novo fatty acid biosynthesis           | ACACA       | TAG.Int.LDB     | 0.52        |    | 0.00042 | 0.009434 |
| Glycerophospholipid metabolism            | LIPA        | DAG.Short.LDB   | 0.52        |    | 0.00043 | 0.009621 |
| Phosphatidylinositol phosphate metabolism | GALNT7      | TAG.Short.LDB   | 0.48        |    | 0.00115 | 0.018668 |
| Beta-oxidation                            | ACAT1       | DAG.Short.LDB   | -0.48       |    | 0.00131 | 0.020254 |
| Beta-oxidation                            | ACAD10      | TAG.Short.LDB   | -0.47       |    | 0.00152 | 0.022385 |
| Glycerophospholipid metabolism            | PLA2G5      | TAG.Int.HDB     | 0.47        |    | 0.00156 | 0.022801 |
| Glycerophospholipid metabolism            | LIPA        | TAG.Short.LDB   | 0.47        |    | 0.00189 | 0.025859 |
| Glycerophospholipid metabolism            | DGKB        | FFA.Unsaturated | -0.46       |    | 0.00197 | 0.026591 |
| Fatty acid desaturase                     | DEGS1       | FFA.Unsaturated | 0.46        |    | 0.00239 | 0.030017 |
| Fatty acid elongase                       | ELOVL1      | TAG.Int.HDB     | -0.46       |    | 0.00240 | 0.030127 |
| Apoptosis                                 | CASP1       | DAG.Short.LDB   | 0.45        |    | 0.00262 | 0.031781 |
| Cholesterol metabolism                    | NSDHL       | TAG.Short.LDB   | -0.45       |  | 0.00275 | 0.032812 |
| Glycerophospholipid metabolism            | PNLIPRP1    | DAG.Short.LDB   | -0.45       |  | 0.00284 | 0.033513 |
| Beta-oxidation                            | ACAD10      | FFA.Saturated   | 0.45        |  | 0.00286 | 0.033648 |
| Fatty acid elongase                       | ELOVL4      | FFA.Saturated   | -0.45       |  | 0.00315 | 0.035725 |
| Fatty acid desaturase                     | DEGS1       | DAG.Short.LDB   | 0.44        |  | 0.00323 | 0.036203 |
| G protein                                 | GNAI2       | DAG.Short.LDB   | 0.44        |  | 0.00329 | 0.036646 |
| Fatty acid elongase                       | ELOVL5      | DAG.Short.LDB   | 0.44        |  | 0.00336 | 0.037161 |
| Beta-oxidation                            | ACAT2       | FFA.Unsaturated | -0.44       |  | 0.00338 | 0.037247 |
| Phosphatidylinositol phosphate metabolism | SPHK2       | DAG.Short.LDB   | -0.44       |  | 0.00388 | 0.040539 |
| De novo fatty acid biosynthesis           | HMGCS1      | AC_Long.PCA     | -0.43       |  | 0.00400 | 0.041401 |
| ras homolog family member C               | RHOC        | FFA.Unsaturated | 0.43        |  | 0.00459 | 0.045033 |
| Beta-oxidation                            | DECR2       | DAG.Short.LDB   | -0.43       |  | 0.00465 | 0.045394 |
| serine-threonine kinase                   | AKT2        | FFA.Unsaturated | -0.43       |  | 0.00479 | 0.046154 |
| GTPase-activating protein                 | ARHGAP32    | DAG.Short.LDB   | -0.42       |  | 0.00514 | 0.048448 |
| Glycerophospholipid metabolism            | LPL         | DAG.Short.LDB   | -0.42       |  | 0.00527 | 0.049273 |
| ras homolog family member D               | RHOD        | DAG.Short.LDB   | -0.42       |  | 0.00543 | 0.050316 |
| G protein subunit protein 13              | GNA13       | TAG.Short.LDB   | 0.42        |  | 0.00578 | 0.052083 |
| Bile acid biosynthesis                    | SOAT2       | DAG.Short.LDB   | -0.42       |  | 0.00584 | 0.052435 |
| P21 activated kinase                      | PAK2        | DAG.Short.LDB   | 0.42        |  | 0.00588 | 0.052699 |
| De novo fatty acid biosynthesis           | ACSL5       | FFA.Unsaturated | 0.42        |  | 0.00593 | 0.052934 |
| GTPase-activating protein                 | ARHGAP32    | TAG.Short.LDB   | -0.42       |  | 0.00600 | 0.053324 |
| Fatty acid elongase                       | ELOVL1      | DAG.Short.LDB   | 0.42        |  | 0.00602 | 0.053442 |
| De novo fatty acid biosynthesis           | LYPLA3      | FFA.Saturated   | 0.42        |  | 0.00604 | 0.05347  |
| Glycerophospholipid metabolism            | PCYT2       | DAG.Short.LDB   | -0.42       |  | 0.00607 | 0.053573 |
| Glycerophospholipid metabolism            | PLA2G2D     | TAG.Short.LDB   | 0.41        |  | 0.00653 | 0.056053 |
| Fatty acid desaturase                     | FADS1       | AC_Long.PCA     | -0.41       |  | 0.00692 | 0.058022 |
| Glycerophospholipid metabolism            | MGLL        | TAG.Int.LDB     | 0.41        |  | 0.00744 | 0.060804 |

Cont...

|                                 |          |                 |       |  |  |         |          |
|---------------------------------|----------|-----------------|-------|--|--|---------|----------|
| De novo fatty acid biosynthesis | ACSL5    | DAG.Short.LDB   | 0.41  |  |  | 0.00772 | 0.062275 |
| Glycerophospholipid metabolism  | DGKB     | DAG.Short.LDB   | -0.40 |  |  | 0.00786 | 0.063063 |
| Glycosphingolipid metabolism    | CERK     | FFA.Saturated   | 0.40  |  |  | 0.00798 | 0.063733 |
| Cholesterol metabolism          | EBP      | FFA.Saturated   | 0.40  |  |  | 0.00803 | 0.063973 |
| Cholesterol metabolism          | TM7SF2   | AC_Long.PCA     | -0.40 |  |  | 0.00843 | 0.066053 |
| Glycerophospholipid metabolism  | PLA2G7   | DAG.Short.LDB   | 0.40  |  |  | 0.00858 | 0.066873 |
| De novo fatty acid biosynthesis | PTGS2    | AC_Long.PCA     | 0.40  |  |  | 0.00864 | 0.067158 |
| Cholesterol metabolism          | MVD      | TAG.Short.LDB   | -0.40 |  |  | 0.00866 | 0.067222 |
| Beta-oxidation                  | DECR2    | FFA.Unsaturated | -0.40 |  |  | 0.00866 | 0.067222 |
| ras homolog family member B     | RHOB     | TAG.Int.HDB     | -0.40 |  |  | 0.00873 | 0.06754  |
| serine-threonine kinase         | PAK3     | DAG.Short.LDB   | -0.40 |  |  | 0.00906 | 0.069057 |
| Ceramide metabolism             | CERS4    | TAG.Short.LDB   | -0.40 |  |  | 0.00926 | 0.070041 |
| Apoptosis                       | CASP1    | TAG.Short.LDB   | 0.40  |  |  | 0.00929 | 0.070225 |
| Protein kinase                  | MAPK3    | DAG.Short.LDB   | -0.40 |  |  | 0.00936 | 0.070552 |
| Bile acid biosynthesis          | SOAT2    | AC_Long.PCA     | -0.39 |  |  | 0.00973 | 0.072185 |
| Glycerophospholipid metabolism  | PAFAH1B1 | TAG.Short.LDB   | 0.39  |  |  | 0.01024 | 0.074242 |
| De novo fatty acid biosynthesis | PLA2G2E  | DAG.Short.LDB   | -0.39 |  |  | 0.01027 | 0.074402 |
| Glycerophospholipid metabolism  | CLCF1    | TAG.Short.LDB   | -0.39 |  |  | 0.01049 | 0.075286 |
| Glycerophospholipid metabolism  | PTDSS2   | TAG.Short.LDB   | -0.39 |  |  | 0.01071 | 0.076241 |
| P21 activated kinase            | PAK4     | DAG.Short.LDB   | -0.39 |  |  | 0.01100 | 0.077591 |
| Glycosphingolipid metabolism    | UGCG     | DAG.Short.LDB   | 0.39  |  |  | 0.01101 | 0.077646 |
| Glycosphingolipid metabolism    | NT5C     | AC_Long.PCA     | -0.39 |  |  | 0.01157 | 0.080118 |
| Glycerophospholipid metabolism  | AGPS     | TAG.Short.LDB   | 0.39  |  |  | 0.01168 | 0.080512 |
| Beta-oxidation                  | ACSL1    | AC_Long.PCA     | -0.39 |  |  | 0.01168 | 0.080527 |
| Cholesterol metabolism          | GGPS1    | FFA.Saturated   | 0.39  |  |  | 0.01173 | 0.080687 |
| Cholesterol metabolism          | IDI1     | FFA.Saturated   | 0.38  |  |  | 0.01288 | 0.0859   |
| Fatty acid desaturase           | FADS3    | DAG.Short.LDB   | 0.38  |  |  | 0.01305 | 0.086585 |
| Cholesterol metabolism          | TM7SF2   | FFA.Unsaturated | -0.38 |  |  | 0.01351 | 0.088627 |
| Glycosphingolipid metabolism    | FUT1     | TAG.Int.HDB     | 0.38  |  |  | 0.01362 | 0.089019 |
| Glycan biosynthesis             | GALNT1   | DAG.Short.LDB   | 0.38  |  |  | 0.01385 | 0.089938 |
| De novo fatty acid biosynthesis | PLA2G4B  | DAG.Short.LDB   | -0.38 |  |  | 0.01393 | 0.0902   |
| Beta-oxidation                  | DECR2    | AC_Long.PCA     | -0.38 |  |  | 0.01419 | 0.09123  |
| Glycosphingolipid metabolism    | PPAP2C   | DAG.Long.HDB    | -0.38 |  |  | 0.01426 | 0.091485 |
| Beta-oxidation                  | ACAD10   | AC_Long.PCA     | -0.38 |  |  | 0.01433 | 0.091733 |
| Glycosphingolipid metabolism    | CHMP4A   | FFA.Saturated   | 0.37  |  |  | 0.01451 | 0.092342 |
| Glycerophospholipid metabolism  | CHKA     | DAG.Short.LDB   | -0.37 |  |  | 0.01463 | 0.092588 |
| Glycosphingolipid metabolism    | PPAP2C   | TAG.Int.HDB     | -0.37 |  |  | 0.01466 | 0.092686 |
| Glycerophospholipid metabolism  | AGPAT2   | FFA.Unsaturated | 0.37  |  |  | 0.01488 | 0.09349  |
| Fatty acid desaturase           | FADS2    | AC_Long.PCA     | -0.37 |  |  | 0.01532 | 0.095347 |
| G protein                       | GNAI1    | DAG.Long.HDB    | -0.37 |  |  | 0.01548 | 0.095888 |
| Glycosphingolipid metabolism    | NT5M     | DAG.Short.LDB   | -0.37 |  |  | 0.01558 | 0.096284 |
| Glycerophospholipid metabolism  | PLA2G2D  | DAG.Short.LDB   | 0.37  |  |  | 0.01591 | 0.09763  |
| Glycerophospholipid metabolism  | LIPA     | FFA.Unsaturated | 0.37  |  |  | 0.01631 | 0.099207 |
| Fatty acid elongase             | ELOVL6   | AC_Long.PCA     | 0.37  |  |  | 0.01637 | 0.099495 |
| De novo fatty acid biosynthesis | FASN     | FFA.Unsaturated | -0.37 |  |  | 0.01645 | 0.099759 |

Cont...

|                                           |         |                 |       |                                                                                       |         |          |
|-------------------------------------------|---------|-----------------|-------|---------------------------------------------------------------------------------------|---------|----------|
| serine-threonine kinase                   | AKT3    | FFA.Saturated   | -0.37 |    | 0.01652 | 0.100115 |
| Glycerophospholipid metabolism            | DGKB    | TAG.Int.HDB     | 0.37  |    | 0.01667 | 0.100717 |
| Cholesterol metabolism                    | SQLE    | AC_Long.PCA     | -0.37 |    | 0.01724 | 0.102716 |
| P21 activated kinase                      | PAK6    | DAG.Short.LDB   | -0.36 |    | 0.01783 | 0.105188 |
| Glycerophospholipid metabolism            | PLD1    | FFA.Unsaturated | -0.36 |    | 0.01798 | 0.105721 |
| Cholesterol metabolism                    | LSS     | TAG.Short.LDB   | -0.36 |    | 0.01874 | 0.108574 |
| Beta-oxidation                            | ACAT1   | TAG.Short.LDB   | -0.36 |    | 0.01956 | 0.111823 |
| ras homolog family member D               | RHOD    | TAG.Short.LDB   | -0.36 |    | 0.01990 | 0.113049 |
| Glycerophospholipid metabolism            | DUSP11  | TAG.Int.HDB     | 0.36  |    | 0.02016 | 0.114053 |
| ras homolog family member D               | RHOD    | FFA.Unsaturated | -0.36 |    | 0.02039 | 0.11474  |
| Cholesterol metabolism                    | SC5D    | AC_Long.PCA     | -0.36 |    | 0.02054 | 0.115354 |
| G protein                                 | GNAQ    | FFA.Unsaturated | -0.36 |    | 0.02067 | 0.115726 |
| De novo fatty acid biosynthesis           | ALOX5   | DAG.Short.LDB   | 0.35  |    | 0.02169 | 0.119225 |
| ras homolog family member D               | RHOD    | AC_Long.PCA     | -0.35 |    | 0.02180 | 0.119546 |
| Glycerophospholipid metabolism            | LPL     | TAG.Short.LDB   | -0.35 |    | 0.02190 | 0.119872 |
| Fatty acid desaturase                     | FADS2   | AC_Int.PCA      | -0.35 |    | 0.02225 | 0.121057 |
| Glycerophospholipid metabolism            | PNPLA6  | TAG.Int.HDB     | -0.35 |    | 0.02254 | 0.122069 |
| Glycosphingolipid metabolism              | FUT1    | DAG.Long.HDB    | 0.35  |    | 0.02347 | 0.125147 |
| Phosphatidylinositol phosphate metabolism | PLCD1   | AC_Long.PCA     | -0.35 |    | 0.02348 | 0.125147 |
| Glycan biosynthesis                       | GALNT8  | FFA.Saturated   | -0.35 |    | 0.02361 | 0.1256   |
| Cholesterol metabolism                    | DHCR7   | TAG.Short.LDB   | -0.35 |    | 0.02379 | 0.126194 |
| Glycerophospholipid metabolism            | PLA2G5  | DAG.Long.HDB    | 0.35  |    | 0.02398 | 0.126919 |
| Phosphatidylinositol phosphate metabolism | PIK3CD  | FFA.Unsaturated | 0.35  |   | 0.02406 | 0.127265 |
| Glycerophospholipid metabolism            | PTDSS2  | DAG.Short.LDB   | -0.35 |  | 0.02466 | 0.129305 |
| Phosphatidylinositol phosphate metabolism | PLCL2   | DAG.Short.LDB   | -0.35 |  | 0.02469 | 0.12937  |
| Steroid hormon biosynthesis               | CYP11A1 | FFA.Unsaturated | -0.34 |  | 0.02596 | 0.133657 |
| G protein                                 | GNAI2   | TAG.Short.LDB   | 0.34  |  | 0.02619 | 0.134557 |
| Glycosphingolipid metabolism              | UGCG    | TAG.Short.LDB   | 0.34  |  | 0.02634 | 0.135071 |
| Fatty acid elongase                       | ELOVL1  | FFA.Unsaturated | 0.34  |  | 0.02747 | 0.138795 |
| Sphingomyelin metabolism                  | S1PR1   | TAG.Short.LDB   | 0.34  |  | 0.02749 | 0.138843 |
| Cholesterol metabolism                    | SQLE    | DAG.Long.HDB    | -0.34 |  | 0.02797 | 0.14039  |
| Apoptosis                                 | CASP1   | FFA.Unsaturated | 0.34  |  | 0.02813 | 0.14083  |
| Beta-oxidation                            | ACAT2   | DAG.Short.LDB   | -0.34 |  | 0.02845 | 0.141746 |
| Phosphatidylinositol phosphate metabolism | PIK3CG  | TAG.Short.LDB   | 0.34  |  | 0.02874 | 0.142549 |
| Cholesterol metabolism                    | NSDHL   | DAG.Short.LDB   | -0.34 |  | 0.02925 | 0.144284 |
| Glycosphingolipid metabolism              | ASAH1   | AC_Long.PCA     | -0.34 |  | 0.02945 | 0.144956 |
| Bile acid biosynthesis                    | SOAT2   | FFA.Unsaturated | -0.34 |  | 0.02959 | 0.145422 |
| Steroid hormon biosynthesis               | CYP11A1 | AC_Int.PCA      | -0.33 |  | 0.03012 | 0.147224 |
| Sphingomyelin metabolism                  | SGMS1   | TAG.Short.LDB   | 0.33  |  | 0.03012 | 0.147224 |
| Cholesterol metabolism                    | GGPS1   | AC_Long.PCA     | -0.33 |  | 0.03020 | 0.147496 |
| Beta-oxidation                            | PPT1    | FFA.Unsaturated | 0.33  |  | 0.03037 | 0.147914 |
| G protein                                 | GNAI2   | FFA.Unsaturated | 0.33  |  | 0.03102 | 0.149772 |
| Glycerophospholipid metabolism            | LPL     | AC_Long.PCA     | -0.33 |  | 0.03123 | 0.150524 |
| Cholesterol metabolism                    | MVK     | FFA.Unsaturated | -0.33 |  | 0.03134 | 0.150783 |
| Beta-oxidation                            | ACOX2   | FFA.Saturated   | 0.33  |  | 0.03134 | 0.150784 |

Cont...

|                                           |          |                 |       |                                                                                       |         |          |
|-------------------------------------------|----------|-----------------|-------|---------------------------------------------------------------------------------------|---------|----------|
| P21 activated kinase                      | PAK4     | FFA.Unsaturated | -0.33 |    | 0.03194 | 0.152615 |
| Cholesterol metabolism                    | DHCR7    | DAG.Short.LDB   | -0.33 |    | 0.03269 | 0.154508 |
| Sphingomyelin metabolism                  | S1PR1    | DAG.Short.LDB   | 0.33  |    | 0.03287 | 0.155008 |
| P21 activated kinase                      | PAK2     | TAG.Short.LDB   | 0.33  |    | 0.03356 | 0.157036 |
| Ceramide metabolism                       | CERS2    | FFA.Saturated   | 0.33  |    | 0.03363 | 0.157274 |
| Glycerophospholipid metabolism            | DGKA     | DAG.Short.LDB   | 0.33  |    | 0.03364 | 0.157324 |
| GTPase-activating protein                 | ARHGAP32 | FFA.Saturated   | -0.33 |    | 0.03398 | 0.158183 |
| Glycerophospholipid metabolism            | PCYT1B   | DAG.Short.LDB   | -0.33 |    | 0.03417 | 0.15869  |
| Beta-oxidation                            | CPT1A    | DAG.Long.HDB    | -0.33 |    | 0.03425 | 0.158929 |
| Glycerophospholipid metabolism            | PLA2G7   | AC_Long.PCA     | 0.33  |    | 0.03449 | 0.159551 |
| Glycerophospholipid metabolism            | AGPAT1   | AC_Int.PCA      | 0.33  |    | 0.03504 | 0.161026 |
| Cholesterol metabolism                    | TM7SF2   | DAG.Short.LDB   | -0.33 |    | 0.03519 | 0.161481 |
| Glycosphingolipid metabolism              | SMPD1    | AC_Int.PCA      | 0.33  |    | 0.03554 | 0.162488 |
| Phosphatidylinositol phosphate metabolism | PLCL2    | TAG.Short.LDB   | -0.32 |    | 0.03597 | 0.163639 |
| Steroid hormone biosynthesis              | STS      | DAG.Short.LDB   | 0.32  |    | 0.03634 | 0.164786 |
| Fatty acid desaturase                     | FADS3    | AC_Long.PCA     | 0.32  |    | 0.03640 | 0.164966 |
| Glycosphingolipid metabolism              | B4GALT7  | DAG.Long.HDB    | 0.32  |    | 0.03640 | 0.164966 |
| Glycosphingolipid metabolism              | CERK     | DAG.Short.LDB   | 0.32  |    | 0.03660 | 0.165606 |
| Fatty acid desaturase                     | DEGS1    | TAG.Short.LDB   | 0.32  |    | 0.03680 | 0.166146 |
| Bile acid biosynthesis                    | SOAT2    | FFA.Saturated   | -0.32 |    | 0.03716 | 0.167291 |
| fucosyltransferase                        | FUT7     | AC_Long.PCA     | -0.32 |    | 0.03751 | 0.16827  |
| Bile acid biosynthesis                    | SOAT1    | FFA.Unsaturated | 0.32  |    | 0.03770 | 0.168925 |
| Glycerophospholipid metabolism            | CHKA     | TAG.Short.LDB   | -0.32 |   | 0.03772 | 0.168927 |
| Fatty acid desaturase                     | SCD5     | AC_Long.PCA     | -0.32 |  | 0.03844 | 0.171015 |
| Apoptosis                                 | CASP1    | AC_Long.PCA     | 0.32  |  | 0.03882 | 0.171931 |
| De novo fatty acid biosynthesis           | PLA2G10  | AC_Int.PCA      | -0.32 |  | 0.03942 | 0.173625 |
| Glycerophospholipid metabolism            | DGKA     | FFA.Unsaturated | 0.32  |  | 0.03986 | 0.174923 |
| Cholesterol metabolism                    | NSDHL    | AC_Long.PCA     | -0.32 |  | 0.03987 | 0.174957 |
| serine-threonine kinase                   | AKT2     | DAG.Short.LDB   | -0.32 |  | 0.04040 | 0.176337 |
| Glycan biosynthesis                       | GALNT1   | TAG.Short.LDB   | 0.32  |  | 0.04081 | 0.1772   |
| Glycerophospholipid metabolism            | PLA2G5   | DAG.Short.LDB   | -0.32 |  | 0.04095 | 0.177517 |
| ras homolog family member A               | RHOA     | TAG.Short.LDB   | 0.32  |  | 0.04136 | 0.178774 |
| Protein kinase                            | MAPK1    | TAG.Short.LDB   | 0.32  |  | 0.04137 | 0.178774 |
| Phosphatidylinositol phosphate metabolism | PLCH2    | DAG.Short.LDB   | -0.32 |  | 0.04193 | 0.180302 |
| Glycerophospholipid metabolism            | PNLIPRP1 | FFA.Unsaturated | -0.32 |  | 0.04216 | 0.180811 |
| Glycerophospholipid metabolism            | DGKZ     | TAG.Int.HDB     | -0.31 |  | 0.04291 | 0.1827   |
| Phosphatidylinositol phosphate metabolism | PLCB3    | DAG.Short.LDB   | 0.31  |  | 0.04369 | 0.184313 |
| Phosphatidylinositol phosphate metabolism | CHKB     | FFA.Saturated   | -0.31 |  | 0.04397 | 0.185068 |
| G protein                                 | GNAI1    | TAG.Int.HDB     | -0.31 |  | 0.04472 | 0.187126 |
| Glycerophospholipid metabolism            | PAFAH1B2 | AC_Long.PCA     | -0.31 |  | 0.04480 | 0.187393 |
| Cholesterol metabolism                    | MVK      | DAG.Short.LDB   | -0.31 |  | 0.04486 | 0.187493 |
| Fatty acid desaturase                     | FADS2    | FFA.Unsaturated | -0.31 |  | 0.04521 | 0.188317 |
| De novo fatty acid biosynthesis           | PNPLA3   | FFA.Unsaturated | -0.31 |  | 0.04521 | 0.188317 |
| Glycerophospholipid metabolism            | LIPA     | TAG.Int.HDB     | -0.31 |  | 0.04570 | 0.189539 |
| De novo fatty acid biosynthesis           | PLA2G4A  | AC_Long.PCA     | 0.31  |  | 0.04577 | 0.189599 |

Cont...

|                                 |          |                 |       |                                                                                      |         |          |
|---------------------------------|----------|-----------------|-------|--------------------------------------------------------------------------------------|---------|----------|
| Glycerophospholipid metabolism  | PNLIP    | FFA.Unsaturated | -0.31 |   | 0.04593 | 0.189927 |
| De novo fatty acid biosynthesis | ACACB    | TAG.Short.LDB   | -0.31 |   | 0.04596 | 0.189954 |
| O-Glycan biosynthesis           | GALNT2   | DAG.Short.LDB   | 0.31  |   | 0.04678 | 0.191743 |
| Glycerophospholipid metabolism  | GPLD1    | TAG.Short.LDB   | -0.31 |   | 0.04700 | 0.192344 |
| De novo fatty acid biosynthesis | ACACB    | DAG.Short.LDB   | -0.31 |   | 0.04748 | 0.193575 |
| Glycerophospholipid metabolism  | PNLIPRP1 | TAG.Short.LDB   | -0.31 |   | 0.04772 | 0.194282 |
| Cholesterol metabolism          | MVK      | AC_Int.PCA      | -0.31 |   | 0.04803 | 0.194936 |
| Glycosphingolipid metabolism    | FUT2     | AC_Long.PCA     | 0.31  |   | 0.04855 | 0.196195 |
| Glycosphingolipid metabolism    | NT5M     | TAG.Short.LDB   | -0.30 |   | 0.04962 | 0.198723 |
| Glycerophospholipid metabolism  | PCYT1B   | TAG.Short.LDB   | -0.30 |   | 0.04970 | 0.19882  |
| Glycerophospholipid metabolism  | PLD1     | AC_Long.PCA     | -0.30 |   | 0.05050 | 0.200858 |
| Cholesterol metabolism          | MVD      | DAG.Short.LDB   | -0.30 |   | 0.05076 | 0.201301 |
| Glycerophospholipid metabolism  | LYPLA2   | AC_Long.PCA     | 0.30  |   | 0.05084 | 0.201422 |
| De novo fatty acid biosynthesis | PLA2G4B  | AC_Int.PCA      | -0.30 |   | 0.05164 | 0.203158 |
| P21 activated kinase            | PAK2     | FFA.Unsaturated | 0.30  |   | 0.05200 | 0.203986 |
| Sphingomyelin metabolism        | SGPP1    | TAG.Int.LDB     | -0.30 |   | 0.05348 | 0.207474 |
| Glycerophospholipid metabolism  | PLD1     | DAG.Short.LDB   | -0.30 |   | 0.05353 | 0.207599 |
| Cholesterol metabolism          | TM7SF2   | TAG.Short.LDB   | -0.30 |   | 0.05358 | 0.207712 |
| Glycan biosynthesis             | GALNT10  | FFA.Unsaturated | -0.30 |   | 0.05364 | 0.207816 |
| De novo fatty acid biosynthesis | SCD      | FFA.Unsaturated | -0.30 |   | 0.05383 | 0.208317 |
| Sphingomyelin metabolism        | S1PR5    | DAG.Long.HDB    | 0.30  |   | 0.05405 | 0.208705 |
| Protein kinase                  | MAPK3    | AC_Long.PCA     | -0.30 |   | 0.05483 | 0.210543 |
| Prostaglandin synthesis         | PTGDS    | TAG.Int.HDB     | -0.30 |  | 0.05484 | 0.210557 |

**Supplement Figure 1:** Comparing inter- and intra-assay coefficients of variation of internal standards in test pools and pooled plasma.

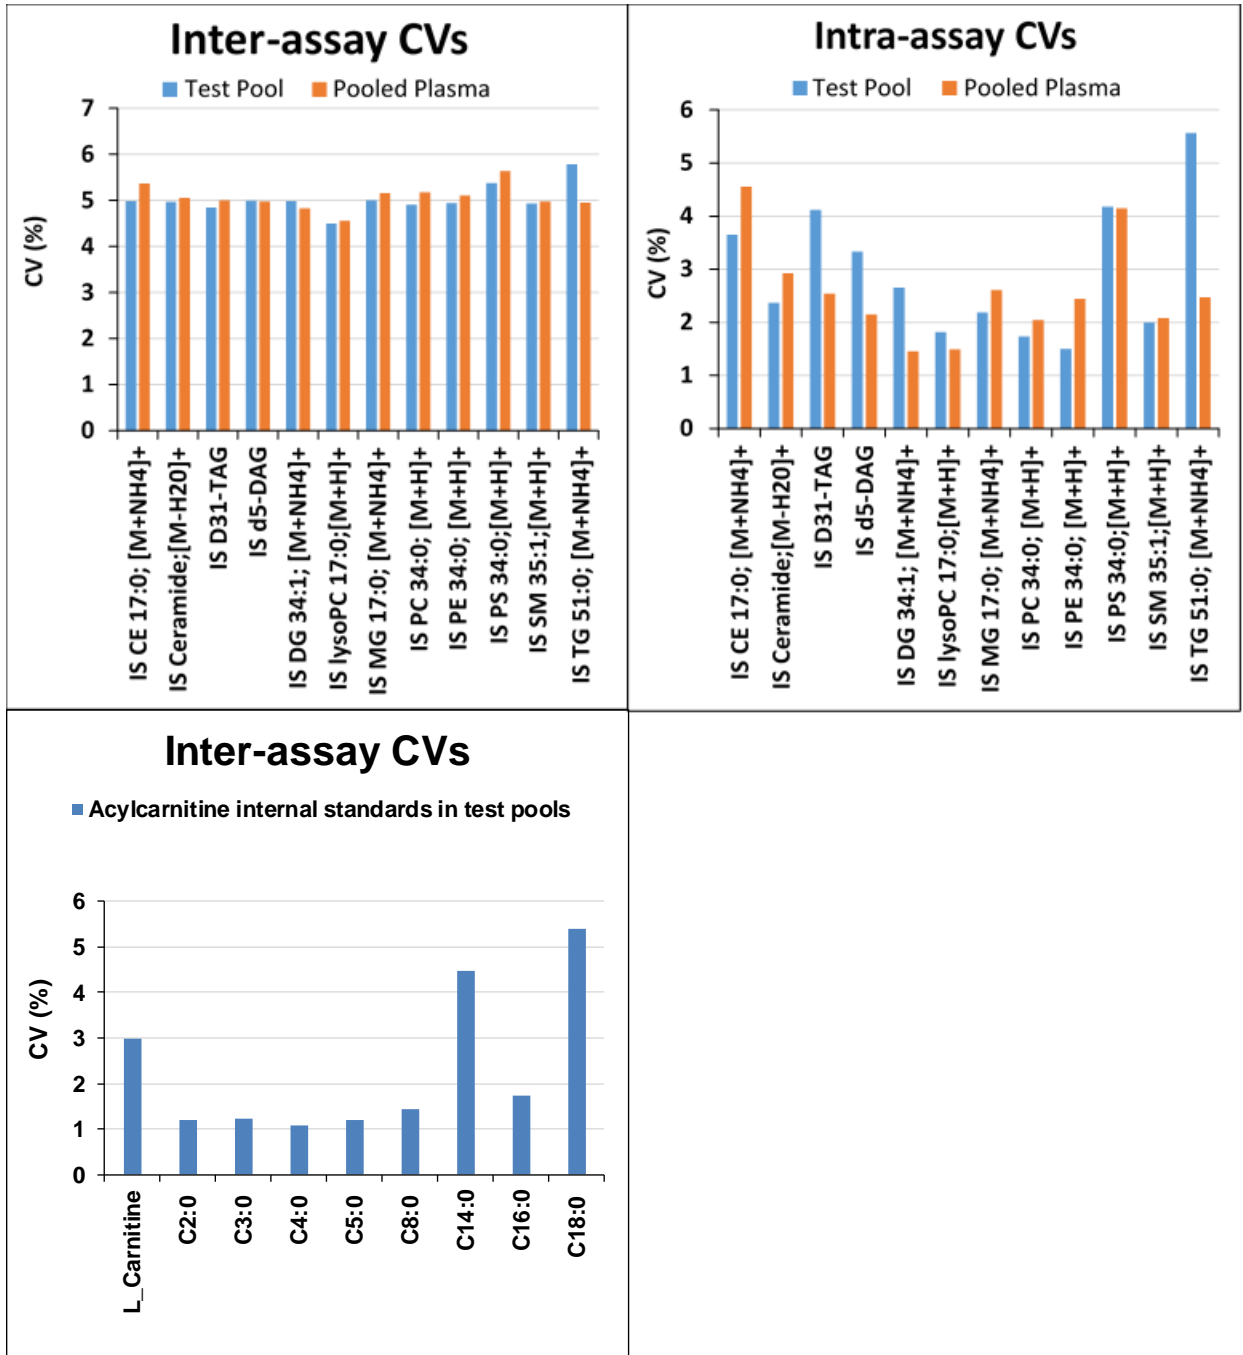

**Supplement Figure 2:** Illustration of minimal batch to batch variation.

A) Distribution of lipidomic platform internal standards in test pools in sequential runs across different batches

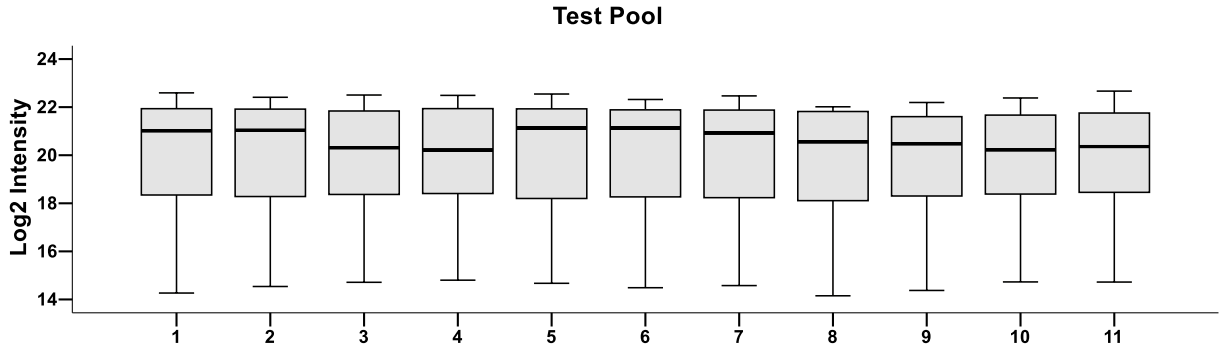

B) Distribution of lipidomic platform internal standards in pooled plasma in sequential runs across different batches

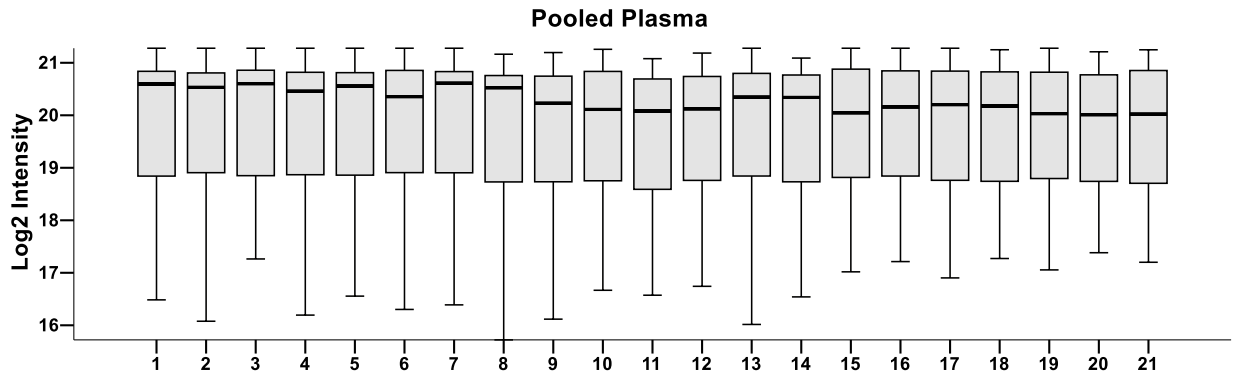

C) Distribution of acylcarnitine internal standards in pooled plasma in sequential runs across different batches

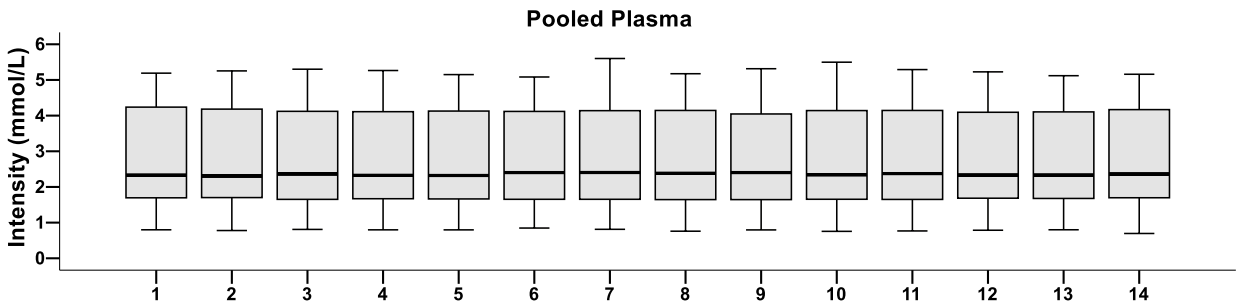

Supplement: jciinsight-4-130317-s254.pdf [file jciinsight-4-130317-s254.pdf]
